# Supplementary material for: Loop diuretic therapy with or without heart failure: impact on prognosis
Source: PubMed Central journal article supplement (PMC11452746; doi:10.1093/eurheartj/ehae345), 2024-06-07
Supplement: ehae345_supplementary_data.pdf [file ehae345_supplementary_data.pdf]

## Table of Contents

|                                                                                                                                                                                                                           |    |
|---------------------------------------------------------------------------------------------------------------------------------------------------------------------------------------------------------------------------|----|
| Coding Systems.....                                                                                                                                                                                                       | 3  |
| Cohort definition .....                                                                                                                                                                                                   | 3  |
| Supplementary Table 1 Database and codes used to generate the cohort. ....                                                                                                                                                | 4  |
| Supplementary Table 2 Codes used to identify a history of CAD, PAD, HF, or a prescription for an ACEi, ARB, MRA, beta-blocker, or loop diuretics. ....                                                                    | 5  |
| Supplementary Figure 1 Flow chart of inclusion and exclusion of NHS Greater Glasgow & Clyde patients.....                                                                                                                 | 12 |
| Supplementary Figure 2 Venn diagram of patients' status on cohort inclusion on 31 December 2011                                                                                                                           | 13 |
| Data sources and coverage.....                                                                                                                                                                                            | 13 |
| Supplementary Table 3 Notes on data sources used for analysis, including date ranges and coverage.                                                                                                                        | 13 |
| Classification of heart failure, medications, socioeconomic deprivation, and co-morbidities .....                                                                                                                         | 15 |
| Supplementary Table 4 ICD-10 and NHS Greater Glasgow & Clyde formatted Read Codes used to identify patients with heart failure. ....                                                                                      | 15 |
| Supplementary Table 5 NHS Greater Glasgow & Clyde formatted Read Codes used to exclude heart failure cases where the code refers to an existing diagnosis after 31 December 2011. ....                                    | 17 |
| Supplementary Table 6 Description of how co-morbidities were defined and the data sources used to define them. ....                                                                                                       | 18 |
| Supplementary Table 7 Prescribed medication classifications, categories each medication was assigned to, the portion of the BNF code used to select for the category, and the description of the BNF selection code. .... | 18 |
| Scottish Index of Multiple Deprivation .....                                                                                                                                                                              | 20 |
| R packages.....                                                                                                                                                                                                           | 20 |
| Aggregated data .....                                                                                                                                                                                                     | 20 |
| Supplementary Table 8 Cohort group by age and sex against the estimated mid-year NHS Greater Glasgow & Clyde Health Board's mid-year 2012 population estimate. ....                                                       | 20 |
| Supplementary Figure 3 Left ventricular ejection fraction (LVEF) data classified by prescription of loop diuretics (LD) and a diagnosis of heart failure (HF) .....                                                       | 23 |
| Supplementary Figure 4 Left atrial diameter data classified by prescription of loop diuretics (LD) and a diagnosis of heart failure (HF).....                                                                             | 24 |
| Supplementary Figure 5 Heart rhythm on 12-lead ECG .....                                                                                                                                                                  | 25 |
| Classification of morbidity and mortality events .....                                                                                                                                                                    | 26 |
| Supplementary Table 9 Definitions of disease categories used for classifying causes of death and hospitalisations. ....                                                                                                   | 26 |
| Supplementary Table 10 Codes used to define infection admissions in SMR01 .....                                                                                                                                           | 27 |
| Supplementary Table 11 Codes used to define chronic respiratory disease admissions in SMR01 .....                                                                                                                         | 28 |

|                                                                                                                                                                                                                                                                                         |    |
|-----------------------------------------------------------------------------------------------------------------------------------------------------------------------------------------------------------------------------------------------------------------------------------------|----|
| Supplementary Figure 6 5-year cumulative incidence of loop diuretic (LD) initiation or diagnosis of heart failure (HF) .....                                                                                                                                                            | 29 |
| Supplementary Figure 7: 4-year mortality from initiation of loop diuretics (LD) or diagnosis of heart failure (HF) during follow-up .....                                                                                                                                               | 30 |
| Supplementary Figure 8 5-year cumulative incidence of causes of death by baseline group classification on 31 December 2011 .....                                                                                                                                                        | 32 |
| Data on the loop diuretic only population .....                                                                                                                                                                                                                                         | 33 |
| Supplementary Table 12 Demographics and co-morbidities of individuals with loop diuretics only at baseline classified by survival status at the end of follow-up.....                                                                                                                   | 33 |
| Supplementary Figure 9 5-year Kaplan-Meier curves to compare survival rates of those with only a loop diuretic at baseline by quintile of age as of 1 January 2012.....                                                                                                                 | 34 |
| Time-dependent covariate analysis.....                                                                                                                                                                                                                                                  | 34 |
| Supplementary Figure 10 Explanation of changes in assigning patient time at risk based on the analysis method.....                                                                                                                                                                      | 35 |
| Handling missing eGFR data.....                                                                                                                                                                                                                                                         | 35 |
| Supplementary Figure 11 Changes in 5-year all-cause mortality adjusted hazard ratios based on using complete eGFR case analysis against replacing missing values in turn with available per group median value, first quartile per group value, and third quartile per group value..... | 36 |
| Supplementary Table 12 Median (1 <sup>st</sup> -3 <sup>rd</sup> quartile) values of eGFR at baseline and time-dependent status for the study population classified by prescription of loop diuretics (LD) and diagnosis of heart failure (HF) .....                                     | 37 |
| Supplementary Figure 12 Number and type of admissions per person-year at risk from 1 January 2012 through 31 December 2016, where the group is a time-dependent covariate. ....                                                                                                         | 38 |
| Supplementary Figure 13 Admission rates using baseline versus time-dependent classifications.....                                                                                                                                                                                       | 39 |
| Supplementary Figure 14 5-year mortality using time-dependent groups. ....                                                                                                                                                                                                              | 40 |
| Supplementary Figure 15 Mortality rates using baseline versus time-dependent classifications.....                                                                                                                                                                                       | 41 |
| Supplementary Figure 16: Classification of group status at time of death using (A) baseline and (B) time-dependent classification prior to death during 5 years of follow-up. ....                                                                                                      | 42 |
| References.....                                                                                                                                                                                                                                                                         | 42 |

## Coding Systems

The analysis used four coding schemes to identify the presence, and assumed absence, of cohort inclusion factors, comorbidities, and medications.

The International Statistical Classification of Diseases and Related Health Problems, 10<sup>th</sup> Revision (ICD-10), is a hierarchical medical classification system and the global standard for morbidity and mortality statistics provided by the World Health Organization (WHO). Unless explicitly noted otherwise, three- and four-digit ICD-10 codes also include all codes below them.

The Office of Population Census and Surveys Classification of Interventions and Procedures, Version 4 (OPCS-4) coding standard is maintained, licensed, and supported by the NHS Digital Terminology and Classification Delivery Service and the standard is governed by Crown Copyright (1). OPCS-4 is a hierarchical coding standard used to classify operations, procedures, and interventions conducted within the NHS. For Scotland, Public Health Scotland Terminology Services provides help and support to NHS Scotland with implementing the Scottish Clinical Coding Standards.

The British National Formulary (BNF) is a joint reference book published by the British Medical Association and Royal Pharmaceutical Society. It contains the standard list of medications used within the NHS. Unique, hierarchical codes are assigned to medications provided on the NHS. The first nine characters specify the chemical level of the medication.

Read Codes are a hierarchical controlled clinical vocabulary of terms and short phrases used for British primary care data. The original version of Read Codes used a standardised 4-byte set, which version 2 extended to a 5-byte unified set. The 5-byte version 2 code added a term code to hold an 'idea' or 'concept'; where the preferred term had '00' appended, and synonyms append term codes 11-99 (2). For example, if the original 5-byte Read Code was 'G630..' for myocardial infarction, the 5-byte version 2 code, with the preferred term code, is 'G630..00' and the first synonym, heart attack, is 'G30..11', followed by coronary thrombosis, 'G30..12'. The NHS Greater Glasgow & Clyde GP data used the 5-byte set of codes without the term code, meaning synonyms are mapped onto the same 5-digit code. For example, 'G580.11', Congestive cardiac failure, and 'G580.00', Congestive heart failure' both map onto 'G580.'. Additionally, trailing space holders (.) have been removed, so 'G580.11' maps to 'G580' and 'G58.00' maps to 'G58'. Clinicians are asked to code the clinical information as specifically as possible, and nurses are asked to code an activity and the underlying disease or condition that led to the activity being carried out (3).

## Cohort definition

This analysis used an existing cohort. The cohort was defined out of the subset of patients receiving care from the NHS Greater Glasgow & Clyde Health Board between 31<sup>st</sup> December 2009 through cohort extraction in 2018 with a record of at least one of the codes listed below between 31 December 2009 through 31 December 2011 in Supplementary Table 1. For the purposes of this analysis, we used an expanded list of codes to follow the president set out by previous studies (see Supplementary Table 2). We felt justified in making this decision because a cohort generated from the codes in Supplementary Table 2 only captures 6,872 individuals eligible to be included. This represents an increase of 1.7% of the individuals who would be potentially eligible for inclusion before applying inclusion and exclusion criteria.

### Supplementary Table I Database and codes used to generate the cohort.

Patients were included based on the existence of a record across at least one of community-based prescriptions, primary care, hospital admission records, or mental health inpatient and day case records between 31 December 2009 through 31 March 2018.

Codes are listed based on the formatting used within Safe Haven, and unless explicitly noted otherwise, three- and four-digit ICD-10 codes include all codes below them. BNF codes include all codes below them.

| Dataset  | Code Type | Variable     | Code     | Description                                                          |
|----------|-----------|--------------|----------|----------------------------------------------------------------------|
| SMR01/04 | ICD-10    | PAD          | I73      | Other peripheral vascular disease                                    |
| SMR01/04 | ICD-10    | CAD          | I24      | Other Acute ischaemic heart disease                                  |
| SMR01/04 | ICD-10    | CAD          | I254     | Coronary artery aneurism and dissection                              |
| SMR01/04 | ICD-10    | CAD          | Z95I     | Presence of aortocoronary bypass graft                               |
| SMR01/04 | ICD-10    | CAD          | Z955     | Presence of coronary angioplasty implant and graft                   |
| SMR01/04 | ICD-10    | HF           | I50      | Heart failure                                                        |
| SMR01/04 | ICD-10    | HF           | I110     | Hypertensive heart disease with (congestive) heart failure           |
| SMR01/04 | ICD-10    | HF           | I130     | Hypertensive heart and renal disease with (congestive) heart failure |
| GP LES   | Read      | PAD          | G734     | Echocardiogram shows left ventricular systolic dysfunction           |
| GP LES   | Read      | CAD          | G340     | Coronary artery disease (CAD)                                        |
| GP LES   | Read      | HF           | G5yy9    | Left ventricular systolic dysfunction (LVSD)                         |
| GP LES   | Read      | HF           | 585f     | Echocardiogram shows left ventricular systolic dysfunction           |
| GP LES   | LES Area  | HF           | 4        | Heart failure                                                        |
| PIS      | BNF       | ACEi         | 020505 I | Angiotensin-converting-enzyme inhibitor (ACEi)                       |
| PIS      | BNF       | ARB          | 0205025  | Angiotensin II receptor blocker (ARB)                                |
| PIS      | BNF       | Beta-blocker | 0204     | Beta-blocker                                                         |
| PIS      | BNF       | LD           | 020202   | Loop diuretics (LD)                                                  |
| PIS      | BNF       | MRA          | 020203   | Mineralocorticoid receptor antagonists (MRA)                         |

SMR01, Scottish Morbidity Records for Acute Inpatient and Day Cases; SMR04, Mental Health Inpatient and Day Cases; GP LES, General Practice Local Enhanced Services; PIS, Prescribing Information System for community-based prescriptions; LES Area, local enhanced service area; ICD-10, International Classification of Disease, 10<sup>th</sup> Version; BNF, British National Formulary; PAD, peripheral arterial disease; CAD, coronary artery disease; HF, heart failure; ACEi, angiotensin-converting-enzyme inhibitor; ARB, angiotensin II receptor blocker; LD, loop diuretic; MRA, mineralocorticoid receptor antagonists.

Supplementary Table 2 Codes used to identify a history of CAD, PAD, HF, or a prescription for an ACEi, ARB, MRA, beta-blocker, or loop diuretics.

| Inclusion reason | Code type                 | Code    | Description                                                  |
|------------------|---------------------------|---------|--------------------------------------------------------------|
| HF               | See Supplementary Table 4 |         | Heart Failure                                                |
| ARB              | See Supplementary Table 7 |         | Angiotensin II receptor blockers                             |
| ACEi             | See Supplementary Table 7 |         | Angiotensin-converting-enzyme inhibitors                     |
| LD               | See Supplementary Table 7 |         | Loop diuretics                                               |
| MRA              | See Supplementary Table 7 |         | Mineralocorticoid-receptor antagonists                       |
| Beta-blocker     | See Supplementary Table 7 |         | Beta-blockers                                                |
| PAD              | Read                      | I4F7    | H/O: arterial lower limb ulcer                               |
|                  | Read                      | I4NB    | H/O: Peripheral vascular disease procedure                   |
|                  | Read                      | 2G63    | Ischaemic toe                                                |
|                  | Read                      | 7A100   | Emerg aortic bypass by anastomosis axillary to femoral art   |
|                  | Read                      | 7A101   | Bypass aorta by anastomosis axillary to femoral artery NEC   |
|                  | Read                      | 7A102   | Axillo-bifemoral bypass graft                                |
|                  | Read                      | 7A103   | Axillo-unifemoral PTFE bypass graft                          |
|                  | Read                      | 7A12.00 | Other bypass of bifurcation of aorta                         |
|                  | Read                      | 7A120   | Emerg bypass bifurc aorta by anast aorta to femoral artery   |
|                  | Read                      | 7A121   | Bypass bifurc aorta by anastom aorta to femoral artery NEC   |
|                  | Read                      | 7A12111 | Aorto bifemoral graft                                        |
|                  | Read                      | 7A12112 | Dacron aortofemoral Y graft                                  |
|                  | Read                      | 7A123   | Bypass bifurcation aorta by anastom aorta to iliac artery    |
|                  | Read                      | 7A12311 | Aorto biiliac graft                                          |
|                  | Read                      | 7A12312 | Dacron aortoiliac Y graft                                    |
|                  | Read                      | 7A12y   | Other specified other bypass of bifurcation of aorta         |
|                  | Read                      | 7A12z   | Other bypass of bifurcation of aorta NOS                     |
|                  | Read                      | 7A192   | Open embolectomy of bifurcation of aorta                     |
|                  | Read                      | 7A41    | Other bypass of iliac artery                                 |
|                  | Read                      | 7A410   | Emerg bypass iliac art by iliac/femoral art anastomosis NEC  |
|                  | Read                      | 7A411   | Bypass iliac artery by iliac/femoral artery anastomosis NEC  |
|                  | Read                      | 7A412   | Emerg bypass iliac artery by femoral/femoral art anast NEC   |
|                  | Read                      | 7A41211 | Emergency femoro-femoral prosthetic cross over graft         |
|                  | Read                      | 7A413   | Bypass iliac artery by femoral/femoral art anastomosis NEC   |
|                  | Read                      | 7A41311 | Femoro-femoral prosthetic cross over graft                   |
|                  | Read                      | 7A414   | Emerg bypass comm iliac art by aorta/com iliac art anast NEC |
|                  | Read                      | 7A416   | Emerg bypass leg artery by aorta/com fem art anastomosis NEC |
|                  | Read                      | 7A419   | Bypass common iliac artery by aorta/com iliac art anast NEC  |

PAD

|      |         |                                                              |
|------|---------|--------------------------------------------------------------|
| Read | 7A41B   | Bypass leg artery by aorta/com femoral art anastomosis NEC   |
| Read | 7A41C   | Bypass leg artery by aorta/deep femoral art anastomosis NEC  |
| Read | 7A41F   | Ilio-femoral prosthetic cross over graft                     |
| Read | 7A41y   | Other specified other bypass of iliac artery                 |
| Read | 7A41z   | Other bypass of iliac artery NOS                             |
| Read | 7A42    | Reconstruction of iliac artery                               |
| Read | 7A420   | Endarterectomy and patch repair of iliac artery              |
| Read | 7A42011 | Endarterectomy and patch repair of common iliac artery       |
| Read | 7A42012 | Iliac endarterectomy and patch                               |
| Read | 7A421   | Endarterectomy of iliac artery NEC                           |
| Read | 7A42111 | Endarterectomy of common iliac artery NEC                    |
| Read | 7A42y   | Other specified reconstruction of iliac artery               |
| Read | 7A42z   | Reconstruction of iliac artery NOS                           |
| Read | 7A43    | Other open operations on iliac artery                        |
| Read | 7A430   | Repair of iliac artery NEC                                   |
| Read | 7A43011 | Repair of common iliac artery NEC                            |
| Read | 7A431   | Open embolectomy of iliac artery                             |
| Read | 7A43111 | Open embolectomy of common iliac artery                      |
| Read | 7A433   | Open insertion of iliac artery stent                         |
| Read | 7A440   | Percutaneous transluminal angioplasty of iliac artery        |
| Read | 7A441   | Percutaneous transluminal embolectomy of iliac artery        |
| Read | 7A443   | Insertion of iliac artery stent                              |
| Read | 7A444   | Percutaneous transluminal insertion of iliac artery stent    |
| Read | 7A44y   | Other specified transluminal operation on iliac artery       |
| Read | 7A44z   | Transluminal operation on iliac artery NOS                   |
| Read | 7A47    | Other emergency bypass of femoral artery or popliteal artery |
| Read | 7A470   | Emerg bypass femoral art by fem/pop art anast c prosth NEC   |
| Read | 7A471   | Emerg bypass popliteal art by pop/pop art anast c prosth NEC |
| Read | 7A472   | Emerg bypass femoral art by fem/pop a anast c vein graft NEC |
| Read | 7A473   | Emerg bypass pop art by pop/pop art anast c vein graft NEC   |
| Read | 7A474   | Emerg bypass femoral art by fem/tib art anast c prosth NEC   |
| Read | 7A476   | Emerg bypass femoral art by fem/tib a anast c vein graft NEC |
| Read | 7A477   | Emerg bypass pop art by pop/tib art anast c vein graft NEC   |
| Read | 7A47B   | Emerg bypass pop art by pop/peron art anast c vein graft NEC |
| Read | 7A47C   | Emerg bypass femoral artery by fem/fem art anastomosis NEC   |
| Read | 7A47D   | Emerg bypass popliteal artery by pop/fem art anastomosis NEC |
| Read | 7A47y   | Other emergency bypass of femoral or popliteal artery OS     |
| Read | 7A47z   | Other emergency bypass of femoral or popliteal artery NOS    |
| Read | 7A48    | Other bypass of femoral artery or popliteal artery           |
| Read | 7A480   | Bypass femoral artery by fem/pop art anast c prosthesis NEC  |
| Read | 7A481   | Bypass popliteal artery by pop/pop a anast c prosthesis NEC  |
| Read | 7A482   | Bypass femoral artery by fem/pop art anast c vein graft NEC  |
| Read | 7A483   | Bypass popliteal artery by pop/pop a anast c vein graft NEC  |

PAD

|      |         |                                                              |
|------|---------|--------------------------------------------------------------|
| Read | 7A484   | Bypass femoral artery by fem/tib art anast c prosthesis NEC  |
| Read | 7A485   | Bypass popliteal artery by pop/tib a anast c prosthesis NEC  |
| Read | 7A486   | Bypass femoral artery by fem/tib art anast c vein graft NEC  |
| Read | 7A487   | Bypass popliteal artery by pop/tib a anast c vein graft NEC  |
| Read | 7A488   | Bypass femoral artery by fem/peron a anast c prosthesis NEC  |
| Read | 7A48A   | Bypass femoral artery by fem/peron a anast c vein graft NEC  |
| Read | 7A48B   | Bypass popliteal art by pop/peron art anast c vein graft NEC |
| Read | 7A48C   | Bypass femoral artery by femoral/femoral art anastomosis NEC |
| Read | 7A48D   | Bypass popliteal artery by pop/fem artery anastomosis NEC    |
| Read | 7A48E   | Femoro-femoral prosthetic cross over graft                   |
| Read | 7A48y   | Other bypass of femoral artery or popliteal artery OS        |
| Read | 7A48z   | Other bypass of femoral artery or popliteal artery NOS       |
| Read | 7A49    | Reconstruction of femoral artery or popliteal artery         |
| Read | 7A490   | Endarterectomy and patch repair of femoral artery            |
| Read | 7A491   | Endarterectomy and patch repair of popliteal artery          |
| Read | 7A492   | Endarterectomy of femoral artery NEC                         |
| Read | 7A493   | Endarterectomy of popliteal artery NEC                       |
| Read | 7A494   | Profundoplasty femoral artery & patch repair deep fem artery |
| Read | 7A495   | Profundoplasty and patch repair of popliteal artery          |
| Read | 7A496   | Profundoplasty of femoral artery NEC                         |
| Read | 7A497   | Profundoplasty of popliteal artery NEC                       |
| Read | 7A498   | Reconstruction of femoral artery with vein graft             |
| Read | 7A499   | Reconstruction of popliteal artery with vein graft           |
| Read | 7A49y   | Reconstruction of femoral or popliteal artery OS             |
| Read | 7A49z   | Reconstruction of femoral or popliteal artery NOS            |
| Read | 7A4A    | Other open operations on femoral artery or popliteal artery  |
| Read | 7A4A0   | Repair of femoral artery NEC                                 |
| Read | 7A4A1   | Repair of popliteal artery NEC                               |
| Read | 7A4A2   | Open embolectomy of femoral artery                           |
| Read | 7A4A211 | Open thrombectomy of femoral artery                          |
| Read | 7A4A212 | Open femoral embolectomy                                     |
| Read | 7A4A3   | Open embolectomy popliteal artery                            |
| Read | 7A4A311 | Open thrombectomy of popliteal artery                        |
| Read | 7A4A7   | Repair of femoral artery with temporary silastic shunt       |
| Read | 7A4A8   | Repair of popliteal artery with temporary silastic shunt     |
| Read | 7A4Ay   | Other open operation on femoral or popliteal artery OS       |
| Read | 7A4B0   | Percutaneous transluminal angioplasty of femoral artery      |
| Read | 7A4B1   | Percutaneous transluminal angioplasty of popliteal artery    |
| Read | 7A4B2   | Percutaneous transluminal embolectomy of femoral artery      |
| Read | 7A4B3   | Percutaneous transluminal embolectomy of popliteal artery    |
| Read | 7A4B4   | Percutaneous transluminal embolisation of femoral artery     |
| Read | 7A4B5   | Percutaneous transluminal embolisation of popliteal artery   |
| Read | 7A4B8   | Percut translum thrombolysis femoral graft streptokinase     |

PAD

|      |         |                                                              |
|------|---------|--------------------------------------------------------------|
| Read | 7A4B9   | Percutaneous transluminal insertion of stent femoral artery  |
| Read | 7A50    | Revision of reconstruction of artery                         |
| Read | 7A500   | Revision of reconstruction involving aorta                   |
| Read | 7A501   | Revision of reconstruction involving iliac artery            |
| Read | 7A502   | Revision of reconstruction involving femoral artery          |
| Read | 7A503   | Revision of reconstruction of popliteal artery               |
| Read | A3A0F   | Gas gangrene-foot                                            |
| Read | C107    | Diabetes mellitus with peripheral circulatory disorder       |
| Read | C1070   | Diabetes mellitus, juvenile +peripheral circulatory disorder |
| Read | C1071   | Diabetes mellitus, adult, + peripheral circulatory disorder  |
| Read | C1073   | IDDM with peripheral circulatory disorder                    |
| Read | C1074   | NIDDM with peripheral circulatory disorder                   |
| Read | C107z   | Diabetes mellitus NOS with peripheral circulatory disorder   |
| Read | C108G   | Insulin dependent diab mell with peripheral angiopathy       |
| Read | C109F   | Non-insulin-dependent d m with peripheral angiopath          |
| Read | C109F11 | Type II diabetes mellitus with peripheral angiopathy         |
| Read | C109F12 | Type 2 diabetes mellitus with peripheral angiopathy          |
| Read | C10EG   | Type 1 diabetes mellitus with peripheral angiopathy          |
| Read | C10FF   | Type 2 diabetes mellitus with peripheral angiopathy          |
| Read | G700    | Aorto-iliac disease                                          |
| Read | G702    | Extremity artery atheroma                                    |
| Read | G702z   | Extremity artery atheroma NOS                                |
| Read | G73     | Other peripheral vascular disease                            |
| Read | G731    | Thromboangiitis obliterans                                   |
| Read | G7310   | Buerger's disease                                            |
| Read | G731z   | Thromboangiitis obliterans NOS                               |
| Read | G732    | Peripheral gangrene                                          |
| Read | G7320   | Gangrene of toe                                              |
| Read | G7321   | Gangrene of foot                                             |
| Read | G733    | Ischaemic foot                                               |
| Read | G73y    | Other specified peripheral vascular disease                  |
| Read | G73y0   | Diabetic peripheral angiopathy                               |
| Read | G73y1   | Peripheral angiopathic disease EC NOS                        |
| Read | G73y2   | Acrocyanosis                                                 |
| Read | G73y4   | Acroparaesthesia - Schultze's type                           |
| Read | G73y5   | Acroparaesthesia - Nothnagel's type                          |
| Read | G73y511 | Nothnagel's vasomotor acroparaesthesia                       |
| Read | G73y6   | Acroparaesthesia - unspecified                               |
| Read | G73y7   | Erythrocyanosis                                              |
| Read | G73y8   | Erythromelalgia                                              |
| Read | G73yz   | Other specified peripheral vascular disease NOS              |
| Read | G73z    | Peripheral vascular disease NOS                              |
| Read | G73z0   | Intermittent claudication                                    |



|     |        |         |                                                                 |
|-----|--------|---------|-----------------------------------------------------------------|
|     | Read   | G73z011 | Claudication                                                    |
|     | Read   | G73zz   | Peripheral vascular disease NOS                                 |
|     | Read   | G740    | Aortoiliac obstruction                                          |
|     | Read   | G7424   | Embolism and thrombosis of the femoral artery                   |
|     | Read   | G7425   | Embolism and thrombosis of the popliteal artery                 |
|     | Read   | G7426   | Embolism and thrombosis of the anterior tibial artery           |
|     | Read   | G7427   | Embolism and thrombosis of the dorsalis pedis artery            |
|     | Read   | G7429   | Embolism and thrombosis of a leg artery NOS                     |
|     | Read   | G742z   | Peripheral arterial embolism and thrombosis NOS                 |
|     | Read   | G74y0   | Embolism and/or thrombosis of the common iliac artery           |
|     | Read   | G74y1   | Embolism and/or thrombosis of the internal iliac artery         |
|     | Read   | G74y2   | Embolism and/or thrombosis of the external iliac artery         |
|     | Read   | G74y3   | Embolism and thrombosis of the iliac artery unspecified         |
|     | Read   | Gyu74   | [X]Other specified peripheral vascular diseases                 |
|     | Read   | M271    | Ischaemic leg ulcer                                             |
|     | Read   | M2710   | Ischaemic ulcer diabetic foot                                   |
|     | Read   | M2713   | Arterial leg ulcer                                              |
|     | Read   | M2714   | Mixed venous and arterial leg ulcer                             |
|     | Read   | R0542   | [D]Gangrene of toe in diabetic                                  |
|     | Read   | R0543   | [D]Widespread diabetic foot gangrene                            |
|     | Read   | R0550   | [D]Failure of peripheral circulation                            |
|     | Read   | R055011 | [D]Peripheral circulatory failure                               |
|     | ICD-10 | I731    | Thromboangiitis obliterans [Buerger]                            |
|     | ICD-10 | I738    | Other specified peripheral vascular diseases                    |
|     | ICD-10 | I739    | Peripheral vascular disease, unspecified                        |
|     | ICD-10 | I743    | Embolism and thrombosis of arteries of lower extremities        |
|     | ICD-10 | I744    | Embolism and thrombosis of arteries of extremities, unspecified |
| PAD | ICD-10 | I745    | Embolism and thrombosis of iliac artery                         |
|     | OPCS-4 | L50     | Other emergency bypass of iliac artery                          |
|     | OPCS-4 | L51     | Other bypass of iliac artery                                    |
|     | OPCS-4 | L52     | Reconstruction of iliac artery                                  |
|     | OPCS-4 | L530    | Other open operations on iliac artery                           |
|     | OPCS-4 | L531    | Repair of iliac artery NEC                                      |
|     | OPCS-4 | L532    | Open embolectomy of iliac artery                                |
|     | OPCS-4 | L541    | Percutaneous transluminal angioplasty of iliac artery           |
|     | OPCS-4 | L542    | Percutaneous transluminal embolectomy of iliac artery           |
|     | OPCS-4 | L544    | Percutaneous transluminal insertion of stent into iliac artery  |
|     | OPCS-4 | L548    | Other specified transluminal operations on iliac artery         |
|     | OPCS-4 | L549    | Unspecified transluminal operations on iliac artery             |
|     | OPCS-4 | L58     | Other emergency bypass of femoral artery                        |
|     | OPCS-4 | L59     | Other bypass of femoral artery                                  |
|     | OPCS-4 | L60     | Reconstruction of femoral artery                                |
|     | OPCS-4 | L620    | Other open operations on femoral artery                         |

|     |        |         |                                                                     |
|-----|--------|---------|---------------------------------------------------------------------|
|     | OPCS-4 | L621    | Repair of femoral artery NEC                                        |
|     | OPCS-4 | L622    | Open embolectomy of femoral artery                                  |
|     | OPCS-4 | L628    | Other specified other open operations on femoral artery             |
|     | OPCS-4 | L629    | Unspecified other open operations on femoral artery                 |
|     | OPCS-4 | L631    | Percutaneous transluminal angioplasty of femoral artery             |
|     | OPCS-4 | L632    | Percutaneous transluminal embolectomy of femoral artery             |
|     | OPCS-4 | L633    | Percutaneous transluminal embolisation of femoral artery            |
|     | OPCS-4 | L635    | Percutaneous transluminal insertion of stent into femoral artery    |
|     | OPCS-4 | L650    | Revision of reconstruction of artery                                |
|     | OPCS-4 | L651    | Revision of reconstruction involving aorta                          |
|     | OPCS-4 | L652    | Revision of reconstruction involving iliac artery                   |
|     | OPCS-4 | L653    | Revision of reconstruction involving femoral artery                 |
| CAD | ICD-10 | I20     | Angina pectoris                                                     |
|     | ICD-10 | I21     | Acute myocardial infarction                                         |
|     | ICD-10 | I22     | Subsequent myocardial infarction                                    |
|     | ICD-10 | I23     | Certain current complications following acute myocardial infarction |
|     | ICD-10 | I24     | Other acute ischaemic heart diseases                                |
|     | ICD-10 | I25     | Chronic ischaemic heart disease                                     |
|     | Read   | I4AL    | H/O: Treatment for ischaemic heart disease                          |
|     | Read   | G310    | Dressler's syndrome                                                 |
|     | Read   | G33z5   | Post infarct angina                                                 |
|     | Read   | 889A    | Diab mellit insulin-glucose infus acute myocardial infarct          |
|     | Read   | 6A2     | Coronary heart disease annual review                                |
|     | Read   | 6A4     | Coronary heart disease review                                       |
|     | Read   | 8B3k    | Coronary heart disease medication review                            |
|     | Read   | 8H2V    | Admit ischaemic heart disease emergency                             |
|     | Read   | G3      | Ischaemic heart disease                                             |
|     | Read   | G31     | Other acute and subacute ischaemic heart disease                    |
|     | Read   | G3110   | Myocardial infarction aborted                                       |
|     | Read   | G311011 | MI - myocardial infarction aborted                                  |
|     | Read   | G31y    | Other acute and subacute ischaemic heart disease                    |
|     | Read   | G31y2   | Subendocardial ischaemia                                            |
|     | Read   | G31y3   | Transient myocardial ischaemia                                      |
|     | Read   | G31yz   | Other acute and subacute ischaemic heart disease NOS                |
|     | Read   | G34     | Other chronic ischaemic heart disease                               |
|     | Read   | G340    | Coronary atherosclerosis                                            |
|     | Read   | G344    | Silent myocardial ischaemia                                         |
|     | Read   | G34y    | Other specified chronic ischaemic heart disease                     |
|     | Read   | G34yl   | Chronic myocardial ischaemia                                        |
|     | Read   | G34yz   | Other specified chronic ischaemic heart disease NOS                 |
|     | Read   | G34z    | Other chronic ischaemic heart disease NOS                           |
|     | Read   | G34z0   | Asymptomatic coronary heart disease                                 |
|     | Read   | G3y     | Other specified ischaemic heart disease                             |

|     |      |         |                                                   |
|-----|------|---------|---------------------------------------------------|
|     | Read | G3z     | Ischaemic heart disease NOS                       |
|     | Read | Gyu3    | [X]Ischaemic heart diseases                       |
|     | Read | Gyu32   | [X]Other forms of acute ischaemic heart disease   |
|     | Read | Gyu33   | [X]Other forms of chronic ischaemic heart disease |
|     | Read | G300    | Acute anterolateral infarction                    |
|     | Read | G301    | Other specified anterior MI                       |
|     | Read | G3010   | Acute anteroapical infarction                     |
|     | Read | G3011   | Acute anteroseptal infarction                     |
|     | Read | G301z   | Anterior MI NOS                                   |
|     | Read | G302    | Acute inferolateral infarction                    |
|     | Read | G303    | Acute inferoposterior infarction                  |
|     | Read | G304    | Posterior MI NOS                                  |
|     | Read | G305    | Lateral MI NOS                                    |
|     | Read | G306    | True posterior MI                                 |
|     | Read | G307    | Acute subendocardial infarction                   |
|     | Read | G3070   | Acute non-Q wave infarction                       |
|     | Read | G3071   | Acute non-ST segment elevation MI                 |
|     | Read | G308    | Inferior MI NOS                                   |
|     | Read | G309    | Acute Q-wave infarct                              |
|     | Read | G30A    | Mural thrombosis                                  |
|     | Read | G30B    | Acute posterolateral MI                           |
|     | Read | G30X    | Acute transmural MI of unspecif site              |
|     | Read | G30X0   | Acute ST segment elevation MI                     |
|     | Read | G30y    | Other acute MI                                    |
|     | Read | G30z    | Acute MI NOS                                      |
|     | Read | G311    | Unstable angina                                   |
|     | Read | G3112   | Angina at rest                                    |
|     | Read | G3113   | Refractory angina                                 |
|     | Read | G3114   | Worsening angina                                  |
|     | Read | G3115   | Acute coronary syndrome                           |
|     | Read | G31y0   | Acute coronary syndrome                           |
|     | Read | G33     | Angina pectoris                                   |
|     | Read | G33z    | Angina pectoris NOS                               |
|     | Read | G33z3   | Angina on effort                                  |
|     | Read | G33z4   | Ischaemic chest pain                              |
|     | Read | G33zz   | Angina pectoris NOS                               |
|     | Read | G3400   | Single coronary vessel disease                    |
|     | Read | G3401   | Double coronary vessel disease                    |
|     | Read | G70y011 | Carotid artery disease                            |
|     | Read | G30     | Acute MI                                          |
|     | Read | G32     | Old MI                                            |
|     | Read | G32     | Old MI                                            |
| CAD |      |         |                                                   |

ICD-10, International Classification of Disease, 10th Version; BNF, British National Formulary; PAD, peripheral arterial disease; CAD, coronary artery disease; HF, heart failure; ACEi, angiotensin-converting-enzyme inhibitor; ARB, angiotensin II receptor blocker; LD, loop diuretic; MRA, mineralocorticoid receptor antagonists.

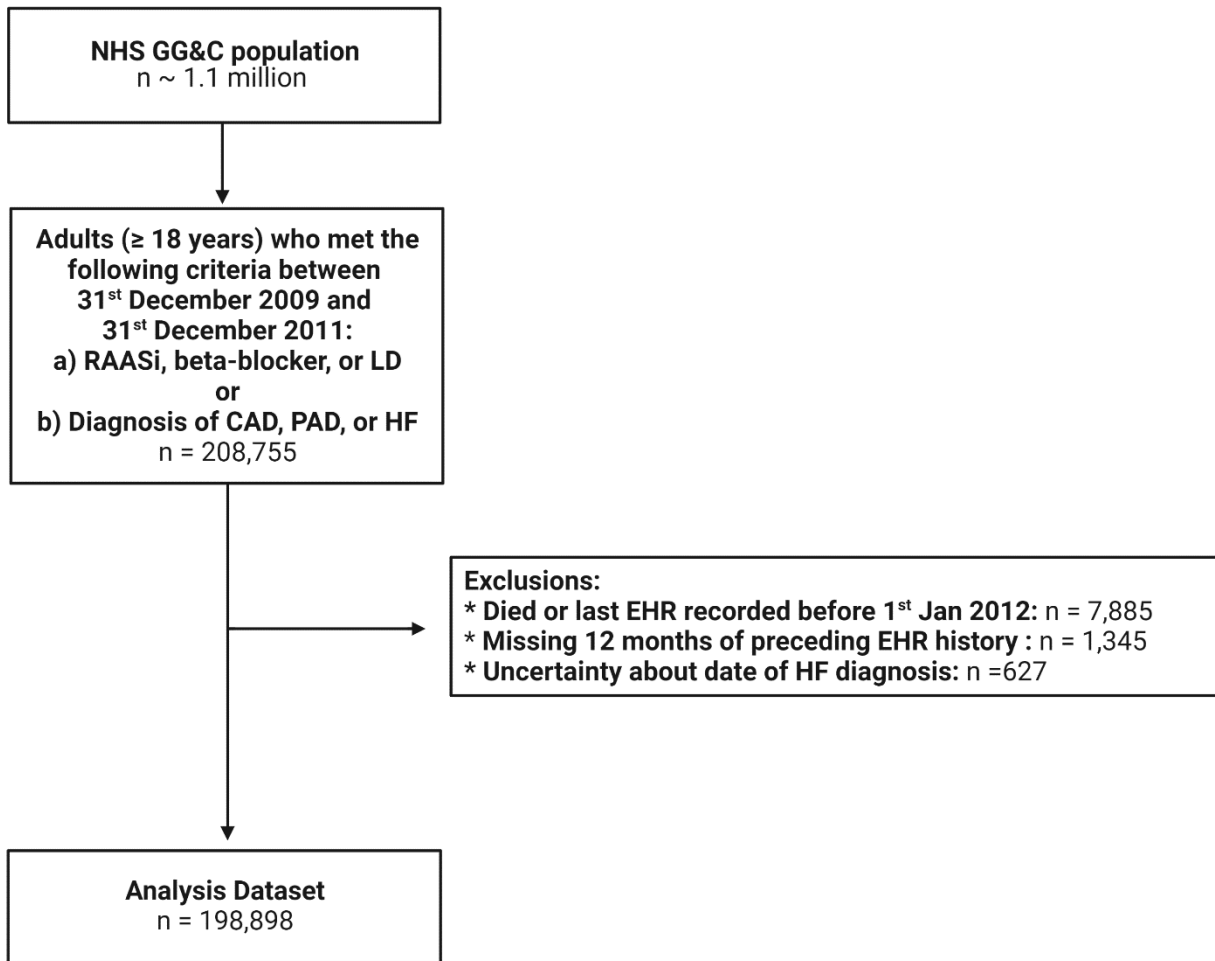

Supplementary Figure I Flow chart of inclusion and exclusion of NHS Greater Glasgow & Clyde patients

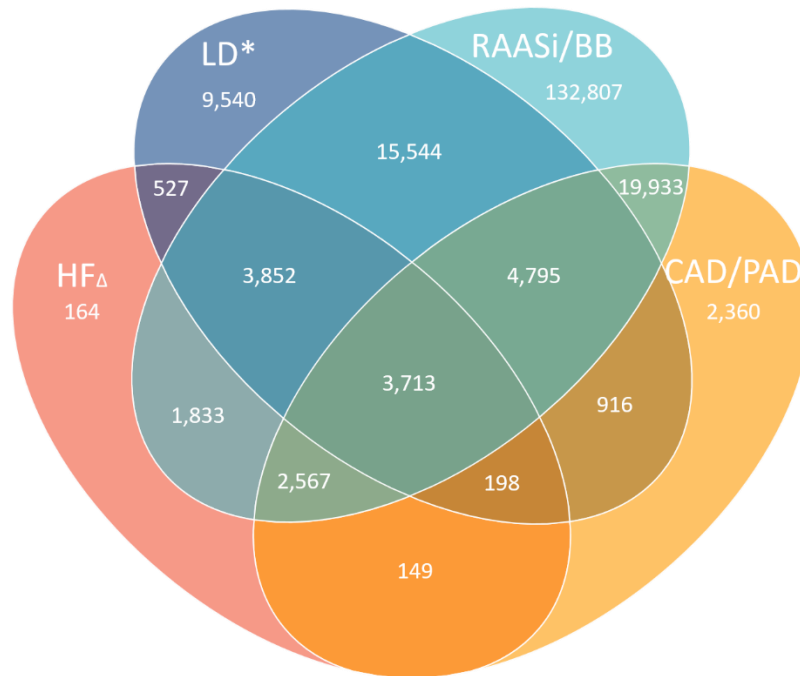

### Supplementary Figure 1 Venn diagram of patients' status on cohort inclusion on 31 December 2011

HF, heart failure; LD, loop diuretics, BB, beta-blocker; RAASi, renin–angiotensin–aldosterone system inhibitors; CAD, coronary artery disease; PAD, peripheral arterial disease.

\* LD includes those with either a single or a repeat prescription of a loop diuretic.

$\Delta$  HF includes diagnosis records from 2000 and <6 individuals who subsequently did not survive their index admission.

### Data sources and coverage

#### Supplementary Table 3 Notes on data sources used for analysis, including date ranges and coverage.

| Data source | Description                         | Notes                                                                                                                                                                                                                                                                                                                                                                                                                                                                                                                                                       | Date Ranges  | Coverage |
|-------------|-------------------------------------|-------------------------------------------------------------------------------------------------------------------------------------------------------------------------------------------------------------------------------------------------------------------------------------------------------------------------------------------------------------------------------------------------------------------------------------------------------------------------------------------------------------------------------------------------------------|--------------|----------|
| SMR00       | Outpatient attendance               | Diagnostic codes for neurological and mental conditions only                                                                                                                                                                                                                                                                                                                                                                                                                                                                                                | 2000 onwards | ≥99%(4)  |
| SMR01       | General/acute inpatient & day cases | Used to define comorbidities. Data are stored as episodes of care, which can contain up to 6 discharge codes and up to 4 procedures. Patients receive a new episode of care each time they change specialty, significant facility, or consultant for medical reasons (5). Continuous admissions were defined as the set of all episodes of care that differed by no more than one calendar day between one episode's discharge and the next episode's admission, allowing for hospital transfers around midnight to be counted as one continuous admission. | 2000 onwards | ≥99%(4)  |
| SMR04       | Mental health inpatient & day cases |                                                                                                                                                                                                                                                                                                                                                                                                                                                                                                                                                             | 2000 onwards | ≥99%     |

|                                                      |                                                           |                                                                                                                                                                                                                                                                                                                                                                     |                                                                   |                                                                                                                               |
|------------------------------------------------------|-----------------------------------------------------------|---------------------------------------------------------------------------------------------------------------------------------------------------------------------------------------------------------------------------------------------------------------------------------------------------------------------------------------------------------------------|-------------------------------------------------------------------|-------------------------------------------------------------------------------------------------------------------------------|
| The Scottish National Prescribing Information System | Community-based prescribing                               | Contains all general practice and hospital-based prescriptions dispensed within the community.                                                                                                                                                                                                                                                                      | 31 December 2009 onwards                                          | ≥99%                                                                                                                          |
| SCI Store                                            | Scottish Care Information (SCI) Store for laboratory data | Haematology and biochemistry laboratory data from primary and secondary care                                                                                                                                                                                                                                                                                        | 2010 onwards                                                      | ≥99%                                                                                                                          |
| Xcelera & EchoPAC                                    | Echocardiography reports                                  | Greater Glasgow & Clyde Health Board reports produced on the two systems                                                                                                                                                                                                                                                                                            | Records start in 2010, but full coverage begins on 1 January 2012 | Greater Glasgow & Clyde Health Board secondary care                                                                           |
| MUSE                                                 | ECG reports                                               | Greater Glasgow & Clyde Health Board generated automatically generated ECG measurements, including QRS duration and rhythm from MUSE-compatible electrocardiographs                                                                                                                                                                                                 | Records start in 2010, but full coverage begins on 1 January 2012 | Greater Glasgow & Clyde Health Board secondary care                                                                           |
| Deaths                                               | Death Records                                             | Death records, including date of death and cause of death                                                                                                                                                                                                                                                                                                           | 2010 onwards                                                      | ≥99%                                                                                                                          |
| GP LES                                               | General Practice Local Enhanced Services                  | Enhanced service areas include coronary heart disease, diabetes, heart failure, stroke, chronic obstructive pulmonary disease (COPD), left ventricular systolic dysfunction (LVSD), learning disability, KeepWell, alcohol misuse, individuals in care homes, and nationally enhanced services for drug misuse. Each record contains, at most, one diagnostic code. | 2000 onwards                                                      | Within the Greater Glasgow & Clyde Health Board, 82.8% of surgeries provided data to General Practice Local Enhanced Services |

## Classification of heart failure, medications, socioeconomic deprivation, and co-morbidities

Patients were considered to have a diagnosis if a code was recorded in any diagnostic or procedural position, where applicable.

Supplementary Table 4 ICD-10 and NHS Greater Glasgow & Clyde formatted Read Codes used to identify patients with heart failure.

| Code Type | Code  | Description                                                                                 | Conrad et al.(6) | Included |
|-----------|-------|---------------------------------------------------------------------------------------------|------------------|----------|
| ICD-10    | I50   | Heart Failure                                                                               | Yes              | Yes      |
| ICD-10    | I420  | Dilated cardiomyopathy (congestive cardiomyopathy)                                          | Yes              | Yes      |
| ICD-10    | I429  | Cardiomyopathy, unspecified (Cardiomyopathy (primary)(secondary) NOS)                       | Yes              | Yes      |
| ICD-10    | I110  | Hypertensive heart disease with (congestive) heart failure                                  | Yes              | Yes      |
| ICD-10    | I255  | Ischaemic cardiomyopathy                                                                    | Yes              | Yes      |
| ICD-10    | I132  | Hypertensive heart and renal disease with both (congestive) heart failure and renal failure | Yes              | Yes      |
| ICD-10    | I130  | Hypertensive heart and renal disease with (congestive) heart failure                        | Yes              | Yes      |
| Read      | 585f  | Echocardiogram shows left ventricular systolic dysfunction                                  | Yes              | Yes      |
| Read      | G58   | Heart Failure                                                                               | Yes              | Yes      |
| Read      | G58I  | Left ventricular failure                                                                    | Yes              | Yes      |
| Read      | 662g  | NYHA classification class II                                                                | Yes              | Yes      |
| Read      | 662f  | NYHA classification - class I                                                               | Yes              | Yes      |
| Read      | G5yy9 | Left ventricular systolic dysfunction                                                       | Yes              | Yes      |
| Read      | G580  | Congestive heart failure                                                                    | Yes              | Yes      |
| Read      | 662h  | NYHA classification- class III                                                              | Yes              | Yes      |
| Read      | 9hH1  | Excepted heart failure quality indicators: informed dissent                                 | Yes              | Yes      |
| Read      | 9hH0  | Excepted heart failure quality indicators: patient unsuitable                               | Yes              | Yes      |
| Read      | 21264 | Heart Failure resolved                                                                      | Yes              | Yes      |
| Read      | G5802 | Decompensated cardiac failure                                                               | Yes              | Yes      |
| Read      | G58z  | Heart failure NOS                                                                           | Yes              | Yes      |
| Read      | 662i  | NYHA classification - class IV                                                              | Yes              | Yes      |
| Read      | G5801 | Chronic congestive heart failure                                                            | Yes              | Yes      |
| Read      | 8HHb  | Referral to heart failure nurse                                                             | Yes              | Yes      |
| Read      | G5810 | Acute left ventricular failure                                                              | Yes              | Yes      |
| Read      | G343  | Ischaemic cardiomyopathy                                                                    | Yes              | Yes      |
| Read      | G582  | Acute heart failure                                                                         | Yes              | Yes      |
| Read      | G5800 | Acute congestive heart failure                                                              | No               | Yes      |
| Read      | G583  | Heart failure with normal ejection fraction                                                 | Yes              | Yes      |
| Read      | 585g  | Echocardiogram shows left ventricular diastolic dysfunction                                 | Yes              | Yes      |
| Read      | G584  | Right ventricular failure                                                                   | Yes              | Yes      |
| Read      | G5yyA | Left ventricular diastolic dysfunction                                                      | Yes              | Yes      |
| Read      | G5544 | Primary dilated cardiomyopathy                                                              | Yes              | Yes      |
| Read      | G55z  | Cardiomyopathy NOS                                                                          | Yes              | Yes      |
| Read      | G5803 | Compensated cardiac failure                                                                 | Yes              | Yes      |
| Read      | G5804 | Congestive heart failure due to valvular disease                                            | Yes              | Yes      |
| Read      | G555  | Alcoholic cardiomyopathy                                                                    | Yes              | Yes      |
| Read      | G551  | Hypertrophic obstructive cardiomyopathy                                                     | Yes              | Yes      |

|      |       |                                                                      |     |     |
|------|-------|----------------------------------------------------------------------|-----|-----|
| Read | G5yyD | Left ventricular cardiac dysfunction                                 | Yes | Yes |
| Read | 9hH   | Exception reporting heart failure quality indicators                 | Yes | Yes |
| Read | G1yzI | Pneumatic left ventricular failure                                   | Yes | Yes |
| Read | 679X  | Heart failure education                                              | Yes | Yes |
| Read | 8HBE  | Heart failure follow-up                                              | Yes | Yes |
| Read | IOI   | Heart failure confirmed                                              | Yes | Yes |
| Read | 8H2S  | Admit heart failure emergency                                        | Yes | Yes |
| Read | 8CMK  | Has heart failure management plan                                    | Yes | Yes |
| Read | 9Or5  | Heart failure monitoring third letter                                | Yes | Yes |
| Read | 9Or3  | Heart failure monitoring first letter                                | Yes | Yes |
| Read | 9Or4  | Heart failure monitoring second letter                               | Yes | Yes |
| Read | 9Or2  | Heart failure monitoring verbal invite                               | Yes | Yes |
| Read | 9Or   | Heart failure monitoring administration                              | Yes | Yes |
| Read | 9OrI  | Heart failure monitoring telephone invite                            | Yes | Yes |
| Read | 8HgD  | Discharge from heart failure nurse service                           | Yes | Yes |
| Read | 8HHz  | Referral to heart failure exercise programme                         | Yes | Yes |
| Read | 8CL3  | Heart failure care plan discussed with patient                       | Yes | Yes |
| Read | 8IEI  | Referral to heart failure exercise program declined                  | Yes | Yes |
| Read | 8IB8  | Referral to heart failure exercise program not indicated             | Yes | Yes |
| Read | 8CeC  | Preferred place of care for next exacerbation heart failure          | Yes | Yes |
| Read | G55   | Cardiomyopathy                                                       | Yes | Yes |
| Read | G5540 | Congestive Cardiomyopathy                                            | Yes | Yes |
| Read | G559  | Arrhythmogenic right ventricular cardiomyopathy                      | Yes | Yes |
| Read | 33BA  | Impaired left ventricular function                                   | Yes | Yes |
| Read | G4Iz  | Chronic cor pulmonale                                                | Yes | Yes |
| Read | G5543 | Hypertrophic non-obstructive cardiomyopathy                          | Yes | Yes |
| Read | G55y  | Secondary cardiomyopathy NOS                                         | Yes | Yes |
| Read | G5542 | Familial cardiomyopathy                                              | Yes | Yes |
| Read | 8CMW8 | Heart failure clinical pathway                                       | Yes | Yes |
| Read | G558I | Cardiomyopathy in myotonic dystrophy                                 | Yes | Yes |
| Read | Gyu5M | [X] Other hypertrophic cardiomyopathy                                | Yes | Yes |
| Read | G2I1I | Benign hypertensive heart disease with CCF                           | Yes | Yes |
| Read | G2IzI | Hypertensive heart disease NOS with CCF                              | Yes | Yes |
| Read | G232  | hypertensive heart and renal disease with (congestive) heart failure | Yes | Yes |
| Read | 662T  | Congestive heart failure monitoring                                  | Yes | Yes |
| Read | 662W  | Heart failure annual review                                          | Yes | Yes |
| Read | 662p  | Heart failure 6 month review                                         | Yes | Yes |
| Read | 9On   | Left ventricular dysfunction monitoring administration               | Yes | Yes |
| Read | 9On0  | Left ventricular dysfunction monitoring 1st letter                   | Yes | Yes |
| Read | 9OnI  | Left ventricular dysfunction monitoring 2nd letter                   | Yes | Yes |
| Read | 9On2  | Left ventricular dysfunction monitoring 3rd letter                   | Yes | Yes |
| Read | 9On3  | Left ventricular dysfunction monitoring verbal invite                | Yes | Yes |
| Read | 9On4  | Left ventricular dysfunction monitoring telephone invite             | Yes | Yes |
| Read | 9N4s  | Did not attend practice nurse heart failure clinic                   | Yes | Yes |
| Read | 8B29  | Cardiac failure therapy                                              | Yes | Yes |
| Read | 23E1  | O/E -pulmonary oedema                                                | Yes | Yes |
| Read | 9hI   | Exception reporting: LVD quality indicators                          | Yes | Yes |
| Read | 9hI2  | Excepted from LVD quality indicators: informed dissent               | Yes | Yes |



|      |       |                                                                   |     |     |
|------|-------|-------------------------------------------------------------------|-----|-----|
| Read | 9h11  | Excepted from LVD quality indicators: Patient unsuitable          | Yes | Yes |
| Read | 14A6  | H/O: heart failure                                                | Yes | Yes |
| Read | 14AM  | H/O: heart failure in last year                                   | Yes | Yes |
| Read | 8HTL0 | Referral to rapid access heart failure clinic                     | Yes | Yes |
| Read | 8IE0  | Referral to heart failure education group declined                | Yes | Yes |
| Read | G234  | Hyperten heart & renal dis + both (congestv) heart and renal fail | No  | Yes |
| Read | 12CR  | HF: Hypertrophic obstructive cardiomyopathy                       | Yes | Yes |

Following previously published methodologies, cases where the first recorded diagnostic code referred to an existing diagnosis were excluded from incident analysis, as the date of diagnosis is unknown (6).

**Supplementary Table 5 NHS Greater Glasgow & Clyde formatted Read Codes used to exclude heart failure cases where the code refers to an existing diagnosis after 31 December 2011.**

| Code    | Description                                                  | Conrad et al. | Included |
|---------|--------------------------------------------------------------|---------------|----------|
| 9N4s    | Did not attend practice nurse heart failure clinic           | Yes           | Yes      |
| 8B29    | Cardiac failure therapy                                      | Yes           | Yes      |
| 679X    | Heart failure education                                      | Yes           | Yes      |
| 8HHb    | Referral to heart failure nurse                              | Yes           | Yes      |
| 23E1    | O/E – pulmonary oedema                                       | Yes           | Yes      |
| 9hH     | Exception reporting: heart failure quality indicators        | Yes           | Yes      |
| 9hH0    | Excepted heart failure quality indicators: Patient unsuitabl | Yes           | Yes      |
| 9hI     | Exception reporting: LVD quality indicators                  | Yes           | Yes      |
| 9h11    | Exception from LVD quality indicators: Patient unsuitable    | Yes           | Yes      |
| 9h12    | Exception from LVD quality indicators: Informed dissent      | Yes           | Yes      |
| 14A6    | H/O: heart failure                                           | Yes           | Yes      |
| 14AM    | H/O: Heart failure in last year                              | Yes           | Yes      |
| 662p    | Heart failure 6 month review                                 | Yes           | Yes      |
| 662T    | Congestive heart failure monitoring                          | Yes           | Yes      |
| 662W    | Heart failure annual review                                  | Yes           | Yes      |
| 8CL3    | Heart failure care plan discussed with patient               | Yes           | Yes      |
| 8HBE    | Heart failure follow-up                                      | Yes           | Yes      |
| 8HHz    | Referral to heart failure exercise programme                 | Yes           | Yes      |
| 8Hk0    | Referred to heart failure education group                    | Yes           | Yes      |
| 9hH1    | Excepted heart failure quality indicators: Informed dissent  | Yes           | Yes      |
| 9Or     | Heart failure monitoring administration                      | Yes           | Yes      |
| 9Or0    | Heart failure review completed                               | Yes           | Yes      |
| 9Or1    | Heart failure monitoring telephone invite                    | Yes           | Yes      |
| 9Or2    | Heart failure monitoring verbal invite                       | Yes           | Yes      |
| 9Or3    | Heart failure monitoring first letter                        | Yes           | Yes      |
| 9Or4    | Heart failure monitoring second letter                       | Yes           | Yes      |
| 9Or5    | Heart failure monitoring third letter                        | Yes           | Yes      |
| 9On     | Left ventricular dysfunction monitoring administration       | Yes           | Yes      |
| 9On0    | Left ventricular dysfunction monitoring first letter         | Yes           | Yes      |
| 9On1    | Left ventricular dysfunction monitoring second letter        | Yes           | Yes      |
| 9On2    | Left ventricular dysfunction monitoring third letter         | Yes           | Yes      |
| 9On3    | Left ventricular dysfunction monitoring verbal invite        | Yes           | Yes      |
| 9On4    | Left ventricular dysfunction monitoring telephone invite     | Yes           | Yes      |
| 2126400 | Heart Failure Resolved                                       | Yes           | Yes      |

|         |                                                            |     |     |
|---------|------------------------------------------------------------|-----|-----|
| 21264   | Heart Failure Resolved                                     | Yes | Yes |
| 8HgD    | Discharged from heart failure nurse service                | Yes | Yes |
| 8HTL000 | Referral to rapid access heart failure clinic              | Yes | Yes |
| 8HTL0   | Referral to rapid access heart failure clinic              | Yes | Yes |
| 8IB8    | Referral to heart failure exercise programme not indicated | Yes | Yes |
| 8IE1    | Referral to heart failure excursive programme declined     | Yes | Yes |
| 8IE0    | Referral to heart failure education group declined         | Yes | Yes |
| 12CR    | FH: Hypertrophic obstructive cardiomyopathy                | Yes | Yes |

Supplementary Table 6 Description of how co-morbidities were defined and the data sources used to define them.

| Co-morbidity                          | Defining the history of co-morbidity                                                                                                                                                                                         | Data sources used            |
|---------------------------------------|------------------------------------------------------------------------------------------------------------------------------------------------------------------------------------------------------------------------------|------------------------------|
| Hypertension                          | CALIBER phenotype                                                                                                                                                                                                            | SMR01, SMR04, & GP LES       |
| Diabetes mellitus                     | A record of diabetes as defined by the CALIBER phenotype                                                                                                                                                                     | SMR01, SMR04, & GP LES       |
| Thyroid disease                       | A record of hyperthyroidism or hypothyroidism as defined by CALIBER phenotype                                                                                                                                                | SMR01, SMR04, & GP LES       |
| Atrial fibrillation or flutter        | Modified from the CALIBER phenotype to only include cases where there was a coded record of a diagnosis                                                                                                                      | SMR01, SMR04, & GP LES       |
| Ischaemic heart disease               | A combination of codes identified in previously published research (7) and CALIBER definitions of myocardial infarction, coronary thrombosis, unstable angina, stable angina, and coronary artery disease.                   | SMR01, SMR04, & GP LES       |
| Myocardial infarction                 | Record of at least one of the following based on CALIBER phenotype: acute myocardial infarction, complications of myocardial infarction, subsequent myocardial infarction, or not otherwise specified myocardial infarction. | SMR01, SMR04, & GP LES       |
| Valve disease                         | CALIBER phenotype                                                                                                                                                                                                            | SMR01, SMR04, & GP LES       |
| Peripheral arterial disease           | CALIBER phenotype                                                                                                                                                                                                            | SMR01, SMR04, & GP LES       |
| Stroke                                | Record of at least one of the following based on CALIBER phenotype: intracerebral haemorrhage, ischaemic stroke, stroke not elsewhere specified, or subarachnoid haemorrhage.                                                | SMR01, SMR04, & GP LES       |
| Chronic obstructive pulmonary disease | CALIBER phenotype                                                                                                                                                                                                            | SMR01, SMR04, & GP LES       |
| Cancer                                | CALIBER phenotype                                                                                                                                                                                                            | SMR01, SMR04, & GP LES       |
| Liver disease                         | CALIBER phenotype was used for the combination of liver fibrosis, sclerosis, and cirrhosis. Codes were only found in SMR01 and SMR04.                                                                                        | SMR01, SMR04, & GP LES       |
| Dementia                              | CALIBER phenotype includes dementia in Alzheimer's disease, vascular or arteriosclerotic dementia, dementia in other diseases or causes, and unspecified dementia.                                                           | SMR0, SMR01, SMR04, & GP LES |

All medications prescribed and dispensed within Scotland for individuals within the cohort have been extracted from the Scottish Prescribing Information System (8). Medications prescribed within the NHS are contained within the British National Formulary (BNF) and are assigned a hierarchical code to identify the product's chapter, section, and paragraph. See <https://openprescribing.net/bnf/> for a complete list of medications. Patients were considered to be on a medication if they had a prescription dispensed within the 180 days leading up to 1 January 2012.

Supplementary Table 7 Prescribed medication classifications, categories each medication was assigned to, the portion of the BNF code used to select for the category, and the description of the BNF selection code.

| Category | BNF selection code | Description |
|----------|--------------------|-------------|
|----------|--------------------|-------------|

|                                      |                                    |                                                            |
|--------------------------------------|------------------------------------|------------------------------------------------------------|
| Alpha-adrenoreceptor blocking agents | 020504                             | Alpha-adrenoceptor blocking agents                         |
| ACEi                                 | 0205051                            | Angiotensin-converting enzyme                              |
| ARB                                  | 0205052<br>0206020Z0               | Angiotensin receptor blockers<br>Valsartan/Amlodipine      |
| Beta-blocker                         | 0204                               | Beta-adrenergic blocking agents                            |
| Bronchodilators                      | 0301                               | Bronchodilators                                            |
| Calcium-channel blockers             | 020602                             | Calcium-channel blockers                                   |
|                                      | 0205052AB                          | Olmesartan medoxomil/amlodipine                            |
|                                      | 0205052AC                          | Olmesartan medoxomil/amlodipine/hydrochlorothiazide        |
|                                      | 0206020C0<br>0206020T0             | Diltiazem hydrochloride<br>Verapamil hydrochloride         |
| Centrally-acting antihypertensives   | 020502                             | Centrally-acting antihypertensive agents                   |
| Digoxin                              | 0201010F                           | Digoxin                                                    |
| Hypoglycemics                        | 060101                             | Insulin                                                    |
|                                      | 060102                             | Other hypoglycaemics                                       |
| Lipid-regulating                     | 0212                               | Lipid-regulating                                           |
| Loop diuretics                       | 020202                             | Loop diuretics                                             |
|                                      | 0202040D0                          | Amiloride HCl with loop diuretics                          |
|                                      | 0202040B0                          | Co-amilofruse (Amiloride hydrochloride/frusemide)          |
|                                      | 0202040T0                          | Spiroonolactone with loop diuretics                        |
|                                      | 0202040U0                          | Triamterene with loop diuretics                            |
|                                      | 0202080D0                          | Bumetanide/Amiloride hydrochloride                         |
|                                      | 0202080C0<br>0202080K0             | Bumetanide/potassium<br>Furosemide/potassium               |
| Low dose aspirin                     | 0209000A0                          | Aspirin                                                    |
|                                      | 0204000AC                          | Bisoprolol fumarate/aspirin                                |
|                                      | 0209000V0                          | Dipyridamole and Aspirin                                   |
| MRA                                  | 0202030X0                          | Eplerenone                                                 |
|                                      | 0202030S0                          | Spiroonolactone                                            |
|                                      | 0202040G0                          | Co-flumactone (Hydroflumethiazide/spiroonolactone)         |
|                                      | 0202040T0                          | Spiroonolactone with loop diuretics                        |
|                                      | 0202040S0                          | Spiroonolactone with thiazides                             |
| NSAIDs                               | 100101                             | Non-steroidal anti-inflammatory drugs                      |
| Oral anticoagulants                  | 020802                             | Oral anticoagulants                                        |
| Thiazides and related                | 020201                             | Thiazides and related                                      |
|                                      | 0202040H                           | Co-triamterzide (Triamterene/hydrochlorothiazide)          |
|                                      | 0202040C0                          | Co-amilozide (Amiloride hydrochloride/hydrochlorothiazide) |
|                                      | 0204000Y0                          | Co-prenozide (Oxprenolol hydrochloride/ cyclopenthiazide)  |
|                                      | 020400040                          | Co-tenidone (Atenolol/chlortalidone)                       |
|                                      | 0205051AB                          | Perindopril tosilate/indapamide                            |
|                                      | 0202040A0                          | Amiloride hydrochloride with thiazides                     |
|                                      | 0202040S0                          | Spiroonolactone with thiazides                             |
|                                      | 0202040V0                          | Triamterene with thiazides                                 |
|                                      | 0202080B0                          | Bendroflumethiazide/potassium                              |
|                                      | 0205052Y0                          | Olmesartan medoxomil/hydrochlorothiazide                   |
|                                      | 020400010                          | Pindolol with diuretic                                     |
|                                      | 020400030                          | Timolol with diuretic                                      |
|                                      | 0204000F0                          | Atenolol with diuretic                                     |
|                                      | 0204000Q0                          | Propranolol hydrochloride with diuretic                    |
|                                      | 0204000W0                          | Metoprolol tartrate with diuretic                          |
|                                      | 0205051H0                          | Enalapril maleate with diuretic                            |
|                                      | 0205051K0                          | Lisinopril with diuretic                                   |
|                                      | 0205051N0                          | Perindopril erbumine with diuretic                         |
|                                      | 0205051P0                          | Quinapril hydrochloride with diuretic                      |
| 0205051Z0                            | Perindopril arginine with diuretic |                                                            |

|                                                                                                                                                                                                                    |           |                                                      |
|--------------------------------------------------------------------------------------------------------------------------------------------------------------------------------------------------------------------|-----------|------------------------------------------------------|
|                                                                                                                                                                                                                    | 0205052A0 | Irbesartan with diuretic                             |
|                                                                                                                                                                                                                    | 0205052P0 | Losartan potassium with diuretic                     |
|                                                                                                                                                                                                                    | 0205052R0 | Telmisartan with diuretic                            |
|                                                                                                                                                                                                                    | 0205052X0 | Valsartan with diuretic                              |
|                                                                                                                                                                                                                    | 0205052AC | Olmesartan medoxomil/amlodipine/ hydrochlorothiazide |
|                                                                                                                                                                                                                    | 0205051G0 | Co-zidocapt (Hydrochlorothiazide/captopril)          |
| Thyroid disorders                                                                                                                                                                                                  | 060201    | Thyroid hormones                                     |
|                                                                                                                                                                                                                    | 0602020D  |                                                      |
|                                                                                                                                                                                                                    | 0602020G  | Antithyroid drugs                                    |
|                                                                                                                                                                                                                    | 0602020N  |                                                      |
| BNF, British National Formulary; ACEi, Angiotensin-converting enzyme inhibitors; ARB, Angiotensin II receptor blocker; MRA, Mineralocorticoid receptor antagonists; NSAIDs, Non-steroidal anti-inflammatory drugs. |           |                                                      |

## Scottish Index of Multiple Deprivation

The Scottish Index of Multiple Deprivation is an area-based measurement of socioeconomic deprivation assigned to residents of Scotland based on where they live. Scottish residents' 2012 status was calculated by the Scottish Government using thirty-one indicators from seven different aspects of deprivation: income, employment, health, education, housing, geographic access, and crime. The indicators are combined using a weighted sum to create a single index, providing a relative ranking for each small geographic area in Scotland. Areas average about 800 individuals (9). It is important to note that the index can only measure an area's level of deprivation, not an individual's level of deprivation; the absence of deprivation should not necessarily be correlated with affluence. The terms most deprived or least deprived were used to refer to the areas and not to the individuals living in those areas (9).

## R packages

The following R packages were the backbone of the analysis: tidyverse (10), survival (11), survminer (12), RODBC (13), viridis (14), cmprsk (15), lubridate (16), broom (17), ggfortify (18), forcats (19), gridExtra (20), ggpubr (21), and reshape2 (22).

## Aggregated data

NHS Greater Glasgow & Clyde Health Board population estimates based on revised National Records of Scotland mid-year population estimates by pre-April 2014 NHS Board areas (23).

## Supplementary Table 8 Cohort group by age and sex against the estimated mid-year NHS Greater Glasgow & Clyde Health (GG&C) Board's mid-year 2012 population estimate.

| Cohort Group | Sex   | Age group | Number | GG&C population estimate | Percent of GG&C population |
|--------------|-------|-----------|--------|--------------------------|----------------------------|
| Neither      | Women | 18-29     | 4,799  | 110,408                  | 4.35                       |
| Neither      | Women | 30-34     | 2,722  | 42,252                   | 6.44                       |
| Neither      | Women | 35-39     | 3,211  | 37,934                   | 8.46                       |
| Neither      | Women | 40-44     | 4,734  | 45,989                   | 10.29                      |
| Neither      | Women | 45-49     | 6,694  | 48,958                   | 13.67                      |
| Neither      | Women | 50-54     | 8,134  | 45,928                   | 17.71                      |
| Neither      | Women | 55-59     | 8,544  | 38,388                   | 22.26                      |
| Neither      | Women | 60-64     | 9,306  | 34,072                   | 27.31                      |
| Neither      | Women | 65-69     | 9,326  | 30,156                   | 30.93                      |
| Neither      | Women | 70-74     | 9,524  | 25,812                   | 36.90                      |
| Neither      | Women | 75-79     | 8,742  | 23,234                   | 37.63                      |
| Neither      | Women | 80-84     | 6,361  | 17,699                   | 35.94                      |
| Neither      | Women | 85-89     | 3,440  | 10,473                   | 32.85                      |
| Neither      | Women | 90+       | 1,485  | 6,103                    | 24.33                      |
| Neither      | Men   | 18-29     | 2,190  | 108,388                  | 2.02                       |

|         |       |       |        |         |       |
|---------|-------|-------|--------|---------|-------|
| Neither | Men   | 30-34 | 1,450  | 40,760  | 3.56  |
| Neither | Men   | 35-39 | 1,987  | 36,359  | 5.46  |
| Neither | Men   | 40-44 | 3,637  | 42,110  | 8.64  |
| Neither | Men   | 45-49 | 5,885  | 44,819  | 13.13 |
| Neither | Men   | 50-54 | 8,589  | 42,508  | 20.21 |
| Neither | Men   | 55-59 | 9,660  | 36,476  | 26.48 |
| Neither | Men   | 60-64 | 10,572 | 32,068  | 32.97 |
| Neither | Men   | 65-69 | 9,670  | 27,327  | 35.39 |
| Neither | Men   | 70-74 | 8,378  | 20,536  | 40.80 |
| Neither | Men   | 75-79 | 6,616  | 16,162  | 40.94 |
| Neither | Men   | 80-84 | 4,117  | 10,555  | 39.01 |
| Neither | Men   | 85-89 | 1,653  | 4,935   | 33.50 |
| Neither | Men   | 90+   | 509    | 1,976   | 25.76 |
| LD Only | Women | 18-29 | 37     | 110,408 | 0.03  |
| LD Only | Women | 30-34 | 62     | 42,252  | 0.15  |
| LD Only | Women | 35-39 | 121    | 37,934  | 0.32  |
| LD Only | Women | 40-44 | 286    | 45,989  | 0.62  |
| LD Only | Women | 45-49 | 513    | 48,958  | 1.05  |
| LD Only | Women | 50-54 | 756    | 45,928  | 1.65  |
| LD Only | Women | 55-59 | 997    | 38,388  | 2.60  |
| LD Only | Women | 60-64 | 1,345  | 34,072  | 3.95  |
| LD Only | Women | 65-69 | 1,630  | 30,156  | 5.41  |
| LD Only | Women | 70-74 | 2,158  | 25,812  | 8.36  |
| LD Only | Women | 75-79 | 2,792  | 23,234  | 12.02 |
| LD Only | Women | 80-84 | 2,714  | 17,699  | 15.33 |
| LD Only | Women | 85-89 | 1,938  | 10,473  | 18.50 |
| LD Only | Women | 90+   | 1,426  | 6,103   | 23.37 |
| LD Only | Men   | 18-29 | 10     | 108,388 | 0.01  |
| LD Only | Men   | 30-34 | 12     | 40,760  | 0.03  |
| LD Only | Men   | 35-39 | 49     | 36,359  | 0.13  |
| LD Only | Men   | 40-44 | 111    | 42,110  | 0.26  |
| LD Only | Men   | 45-49 | 178    | 44,819  | 0.40  |
| LD Only | Men   | 50-54 | 308    | 42,508  | 0.72  |
| LD Only | Men   | 55-59 | 463    | 36,476  | 1.27  |
| LD Only | Men   | 60-64 | 750    | 32,068  | 2.34  |
| LD Only | Men   | 65-69 | 929    | 27,327  | 3.40  |
| LD Only | Men   | 70-74 | 1,120  | 20,536  | 5.45  |
| LD Only | Men   | 75-79 | 1,219  | 16,162  | 7.54  |
| LD Only | Men   | 80-84 | 1,032  | 10,555  | 9.78  |
| LD Only | Men   | 85-89 | 688    | 4,935   | 13.94 |
| LD Only | Men   | 90+   | 319    | 1,976   | 16.14 |
| HF Only | Women | 18-29 | 19     | 110,408 | 0.02  |
| HF Only | Women | 30-34 | 11     | 42,252  | 0.03  |
| HF Only | Women | 35-39 | 19     | 37,934  | 0.05  |
| HF Only | Women | 40-44 | 24     | 45,989  | 0.05  |
| HF Only | Women | 45-49 | 59     | 48,958  | 0.12  |
| HF Only | Women | 50-54 | 94     | 45,928  | 0.20  |
| HF Only | Women | 55-59 | 121    | 38,388  | 0.32  |
| HF Only | Women | 60-64 | 144    | 34,072  | 0.42  |

|               |       |       |     |         |      |
|---------------|-------|-------|-----|---------|------|
| HF Only       | Women | 65-69 | 203 | 30,156  | 0.67 |
| HF Only       | Women | 70-74 | 232 | 25,812  | 0.90 |
| HF Only       | Women | 75-79 | 277 | 23,234  | 1.19 |
| HF Only       | Women | 80-84 | 236 | 17,699  | 1.33 |
| HF Only       | Women | 85-89 | 148 | 10,473  | 1.41 |
| HF Only       | Women | 90+   | 83  | 6,103   | 1.36 |
| HF Only       | Men   | 18-29 | 20  | 108,388 | 0.02 |
| HF Only       | Men   | 30-34 | 25  | 40,760  | 0.06 |
| HF Only       | Men   | 35-39 | 32  | 36,359  | 0.09 |
| HF Only       | Men   | 40-44 | 83  | 42,110  | 0.20 |
| HF Only       | Men   | 45-49 | 172 | 44,819  | 0.38 |
| HF Only       | Men   | 50-54 | 323 | 42,508  | 0.76 |
| HF Only       | Men   | 55-59 | 356 | 36,476  | 0.98 |
| HF Only       | Men   | 60-64 | 448 | 32,068  | 1.40 |
| HF Only       | Men   | 65-69 | 538 | 27,327  | 1.97 |
| HF Only       | Men   | 70-74 | 530 | 20,536  | 2.58 |
| HF Only       | Men   | 75-79 | 481 | 16,162  | 2.98 |
| HF Only       | Men   | 80-84 | 328 | 10,555  | 3.11 |
| HF Only       | Men   | 85-89 | 117 | 4,935   | 2.37 |
| HF Only       | Men   | 90+   | 33  | 1,976   | 1.67 |
| Both: LD + HF | Women | 18-29 | 6   | 110,408 | 0.01 |
| Both: LD + HF | Women | 30-34 | 9   | 42,252  | 0.02 |
| Both: LD + HF | Women | 35-39 | 17  | 37,934  | 0.04 |
| Both: LD + HF | Women | 40-44 | 34  | 45,989  | 0.07 |
| Both: LD + HF | Women | 45-49 | 34  | 48,958  | 0.07 |
| Both: LD + HF | Women | 50-54 | 62  | 45,928  | 0.13 |
| Both: LD + HF | Women | 55-59 | 134 | 38,388  | 0.35 |
| Both: LD + HF | Women | 60-64 | 212 | 34,072  | 0.62 |
| Both: LD + HF | Women | 65-69 | 338 | 30,156  | 1.12 |
| Both: LD + HF | Women | 70-74 | 530 | 25,812  | 2.05 |
| Both: LD + HF | Women | 75-79 | 728 | 23,234  | 3.13 |
| Both: LD + HF | Women | 80-84 | 750 | 17,699  | 4.24 |
| Both: LD + HF | Women | 85-89 | 629 | 10,473  | 6.01 |
| Both: LD + HF | Women | 90+   | 476 | 6,103   | 7.80 |
| Both: LD + HF | Men   | 18-29 | <6  | 108,388 | 0.00 |
| Both: LD + HF | Men   | 30-34 | <6  | 40,760  | 0.01 |
| Both: LD + HF | Men   | 35-39 | 10  | 36,359  | 0.03 |
| Both: LD + HF | Men   | 40-44 | 38  | 42,110  | 0.09 |
| Both: LD + HF | Men   | 45-49 | 81  | 44,819  | 0.18 |
| Both: LD + HF | Men   | 50-54 | 129 | 42,508  | 0.30 |
| Both: LD + HF | Men   | 55-59 | 249 | 36,476  | 0.68 |
| Both: LD + HF | Men   | 60-64 | 371 | 32,068  | 1.16 |
| Both: LD + HF | Men   | 65-69 | 527 | 27,327  | 1.93 |
| Both: LD + HF | Men   | 70-74 | 659 | 20,536  | 3.21 |
| Both: LD + HF | Men   | 75-79 | 727 | 16,162  | 4.50 |
| Both: LD + HF | Men   | 80-84 | 588 | 10,555  | 5.57 |
| Both: LD + HF | Men   | 85-89 | 341 | 4,935   | 6.91 |
| Both: LD + HF | Men   | 90+   | 158 | 1,976   | 8.00 |

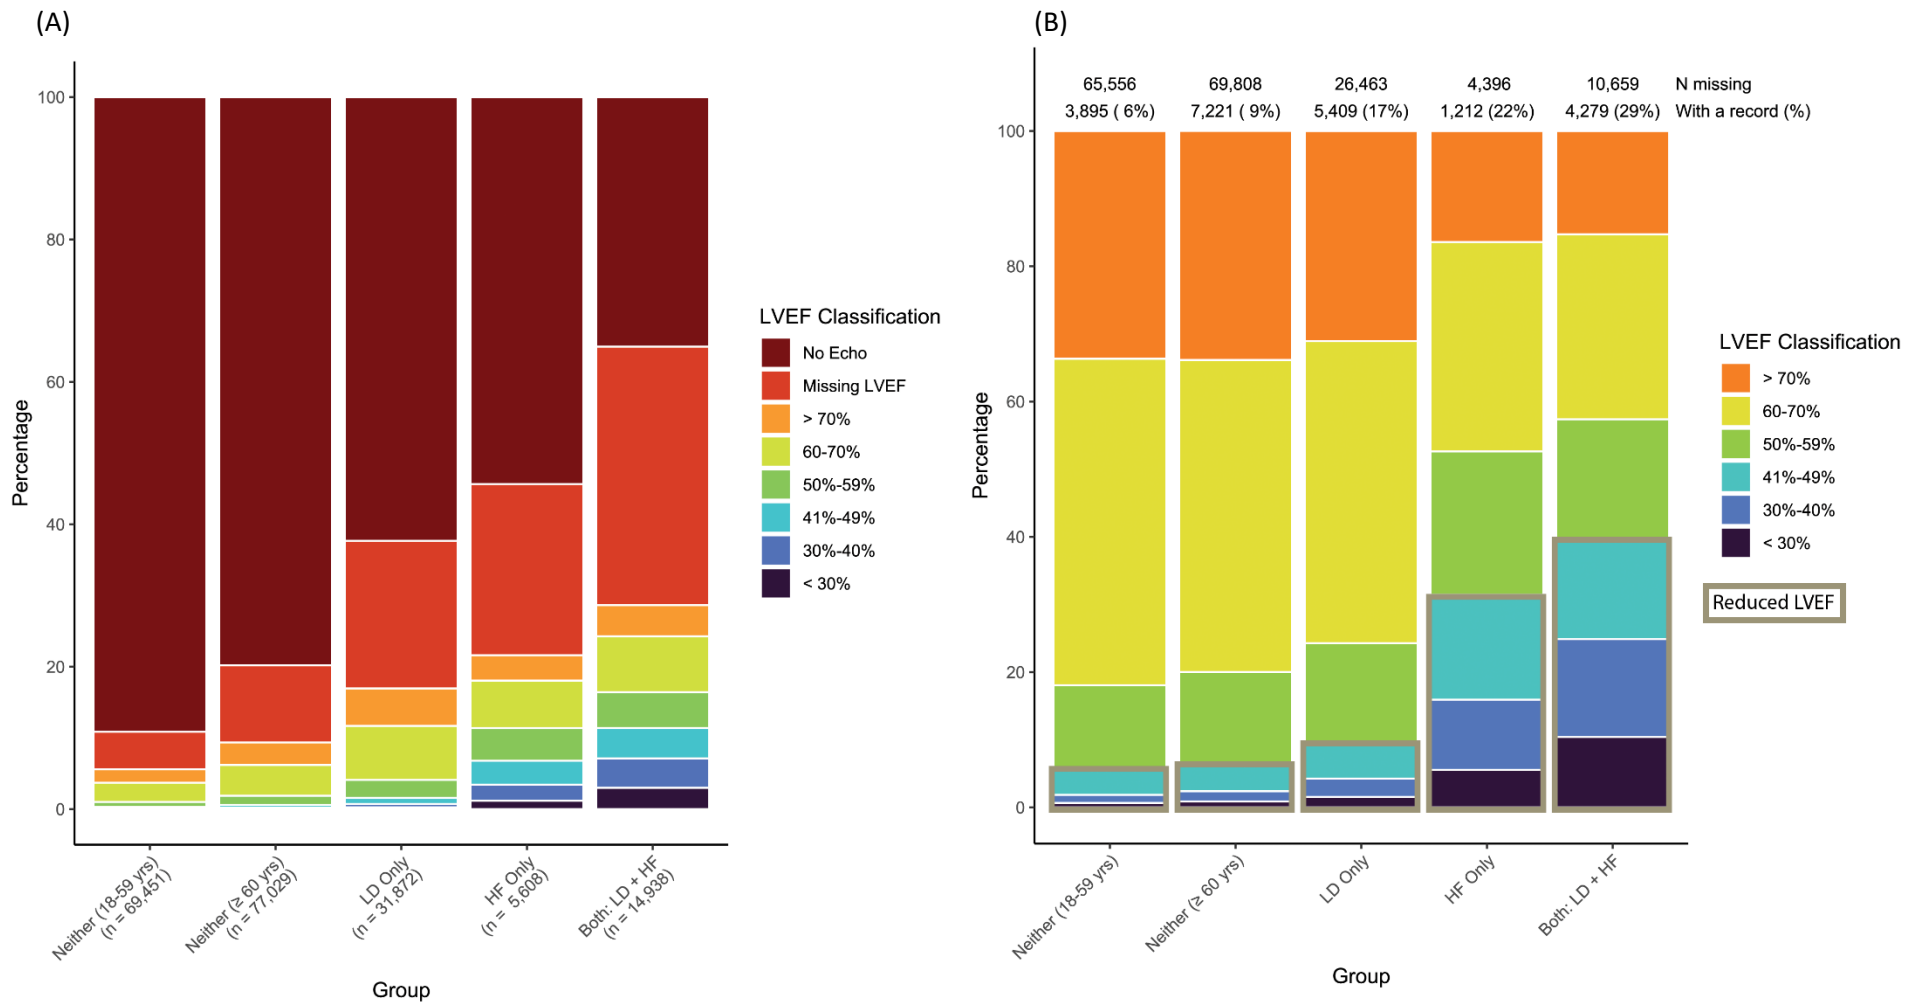

**Supplementary Figure 3 Left ventricular ejection fraction (LVEF) data classified by prescription of loop diuretics (LD) and a diagnosis of heart failure (HF)**

Data taken from the test closest to the date of the last transition (initiation of loop diuretic or diagnosis of HF) (many bedside echocardiograms would not be included in the electronic health record).

- (A) Distribution of missing data and LVEF measurements when available.
- (B) Distribution of LVEF only for those with a record. The grey box indicates a reduced ejection fraction (LVEF < 50%).

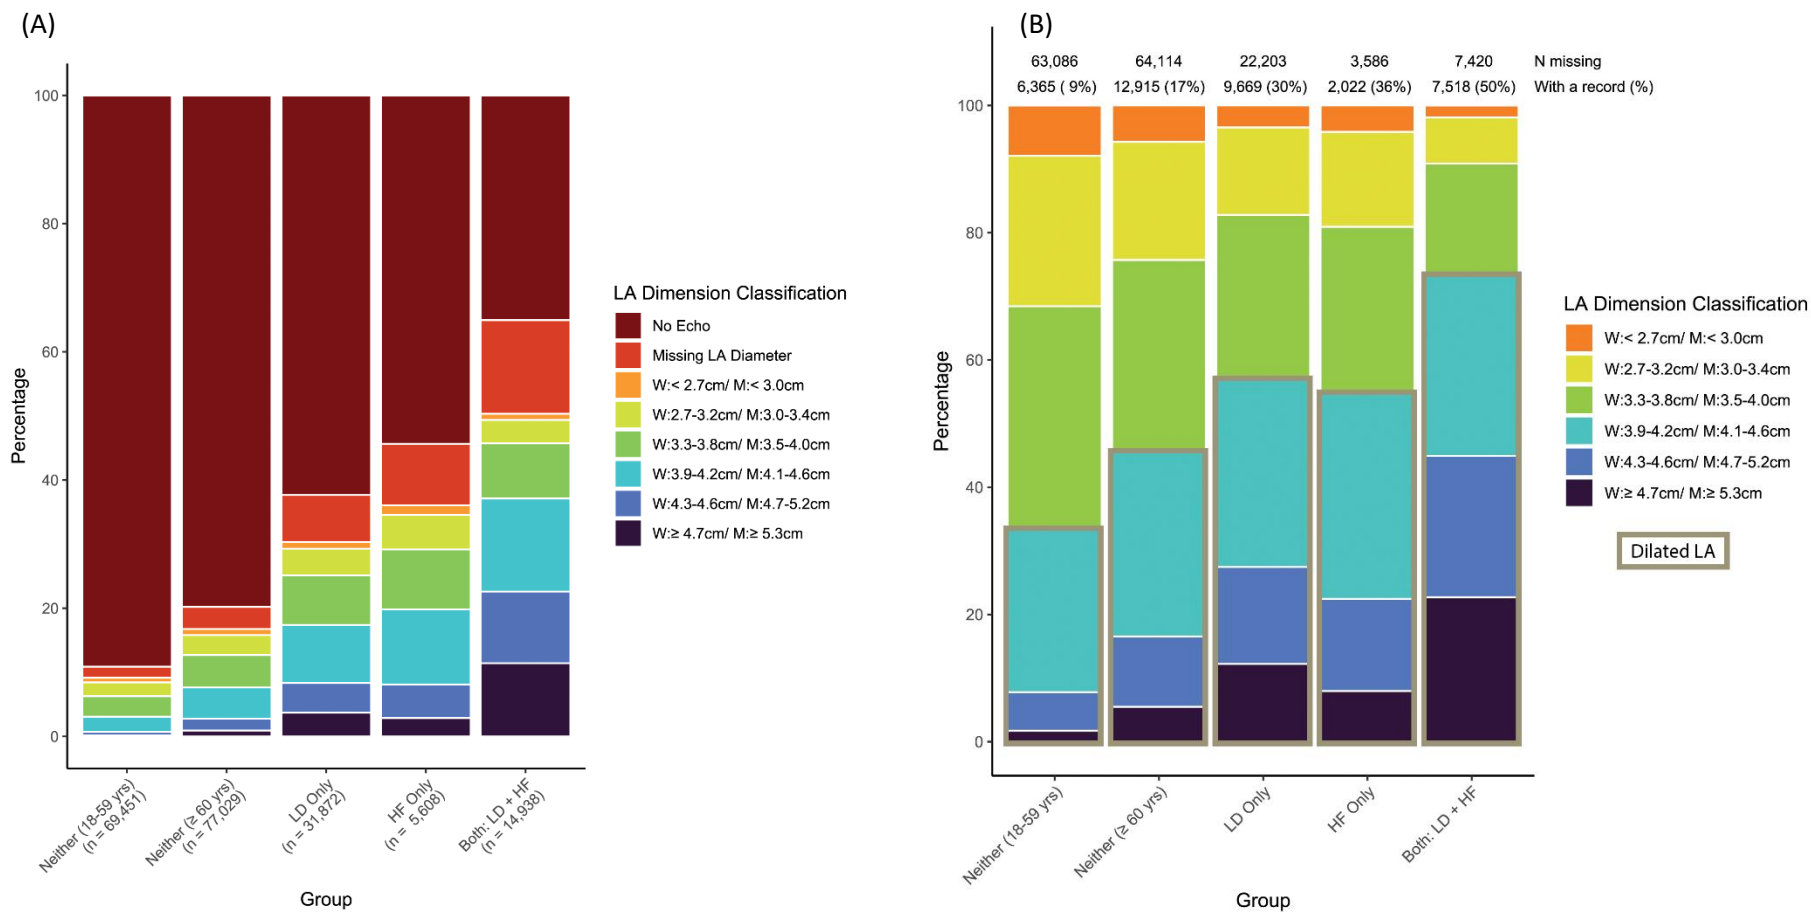

### Supplementary Figure 4 Left atrial diameter data classified by prescription of loop diuretics (LD) and a diagnosis of heart failure (HF)

Data was taken from the test closest to the date of the last transition (initiation of loop diuretic or diagnosis of HF) (many bedside echocardiograms would not be included in the electronic health record).

(A) Distribution of missing data and left atrial (LA) measurements when available.

(B) Distribution of left atrial (LA) measurements for those with a record. The grey box indicates a dilated left atrium (LA).

W = women; M = men



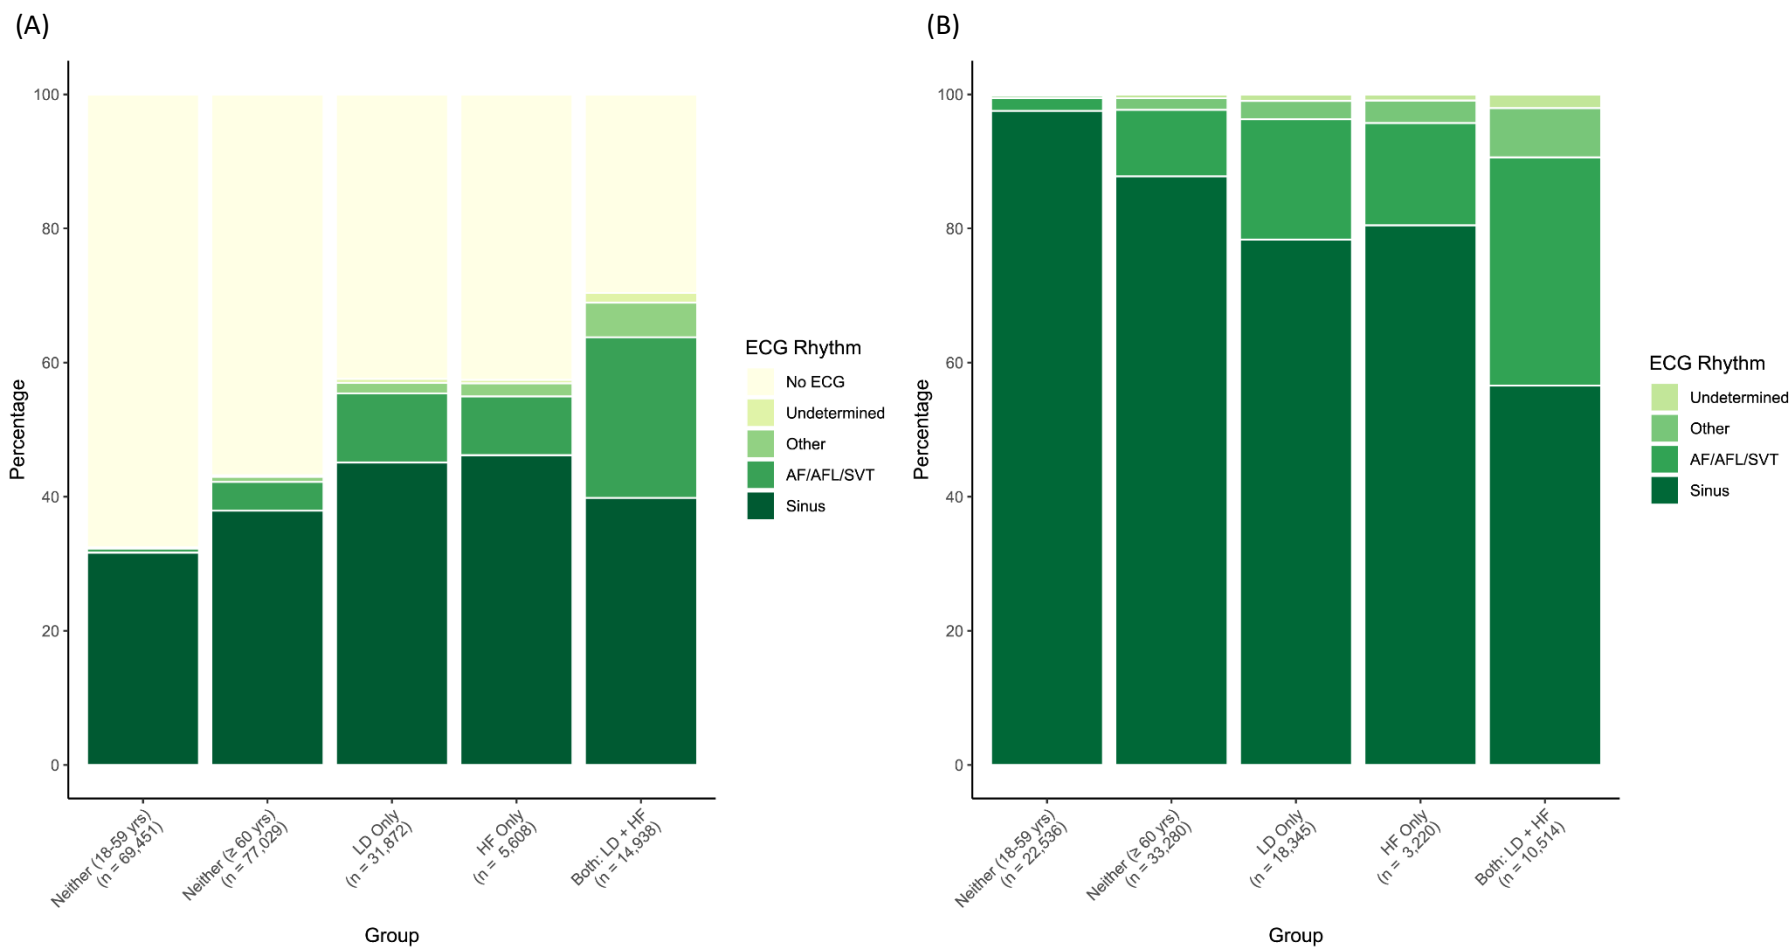

### Supplementary Figure 5 Heart rhythm on 12-lead ECG

(A) Rhythm classification by group, including the percentage of patients without a 12-lead ECG, and (B) rhythm classification of those with a recorded ECG. Data and group were taken from the test recorded closest to the date of the last transition from a MUSE-compatible ECG, which may exclude bedside/emergency room tests.

- (A) Distribution of missing data and heart rhythm when available.
- (B) Distribution of heart rhythm only for those with a record.

Where ECGs were recorded, the 'Neither (18-59 yrs)' group had a median QRS duration (1<sup>st</sup> – 3<sup>rd</sup> quartile) of 86 (80-96) ms; 'Neither (18-59 yrs)' had a duration of 88 (80 – 98) ms; those dispensed loop diuretics without HF (LD Only) had a duration of 88 (80 – 98) ms; those with a diagnosis of HF without loop diuretics (HF Only) had a duration of 94 (84 – 108) ms; and those with both loop diuretics and HF (Both: LD + HF) had a duration of 98 (86 – 122) ms.

## Classification of morbidity and mortality events

### Supplementary Table 9 Definitions of disease categories used for classifying causes of death and hospitalisations.

| <b>Causes of death</b>                                                                                                                                                                                 | <b>Causes of hospitalisation</b>                                                                                                                                                                                                                                                                                                                                                                                                                                                                                                                                                                                                        |
|--------------------------------------------------------------------------------------------------------------------------------------------------------------------------------------------------------|-----------------------------------------------------------------------------------------------------------------------------------------------------------------------------------------------------------------------------------------------------------------------------------------------------------------------------------------------------------------------------------------------------------------------------------------------------------------------------------------------------------------------------------------------------------------------------------------------------------------------------------------|
| <p><b>CV:</b> ICD-10 Chapter IX 'Diseases of the circulatory system' (code range I00-I99), except for those classified as an infection.</p>                                                            | <p><b>Heart Failure:</b> ICD-10 codes: I50 'Heart Failure' (includes I50.0, I50.1, I50.9), I42.0 'Dilated cardiomyopathy', I42.9 'Cardiomyopathy, unspecified', I11.0 'Hypertensive heart disease with (congestive) heart failure', I25.5 'Ischaemic cardiomyopathy', I13.0 'Hypertensive heart and renal disease with (congestive) heart failure', I13.2 'Hypertensive heart and renal disease with both (congestive) heart failure and renal failure'.</p> <p><b>Other Cardiovascular Disorders:</b> ICD-10 Chapter IX 'Disorders of the circulatory system' (I00 - I99), excluding codes related to heart failure or infections.</p> |
| <p><b>Neoplasms:</b> ICD-10 Chapter II 'Neoplasms' (C00 - D48)</p>                                                                                                                                     |                                                                                                                                                                                                                                                                                                                                                                                                                                                                                                                                                                                                                                         |
| <p><b>Infections:</b> Individual codes are listed in Table Supplementary Table 10.</p>                                                                                                                 |                                                                                                                                                                                                                                                                                                                                                                                                                                                                                                                                                                                                                                         |
| <p>Other: any code not falling into any of the above categories, including the 257 deaths where the cause of death was unknown.</p>                                                                    | <p><b>Chronic Respiratory Disease:</b> individual codes listed in Supplementary Table 11.</p>                                                                                                                                                                                                                                                                                                                                                                                                                                                                                                                                           |
|                                                                                                                                                                                                        | <p><b>Digestive Diseases:</b> ICD-10 Chapter XI 'Diseases of the digestive system' (K00-K93), excluding codes categorised as infections.</p>                                                                                                                                                                                                                                                                                                                                                                                                                                                                                            |
|                                                                                                                                                                                                        | <p><b>Eye &amp; Adnexa:</b> ICD-10 Chapter VII 'Disease of the eye and adnexa' (H00-H59), excluding codes categorised as infections.</p>                                                                                                                                                                                                                                                                                                                                                                                                                                                                                                |
|                                                                                                                                                                                                        | <p><b>Injury:</b> ICD-10 Chapter XIX 'Injury, poisoning and certain other consequences of external causes' (S00-T98), and ICD-10 Chapter XX 'External Causes of morbidity and mortality' (V01-Y09).</p>                                                                                                                                                                                                                                                                                                                                                                                                                                 |
|                                                                                                                                                                                                        | <p><b>Mental Health &amp; Neurological Disorders:</b> ICD-10 Chapter IV 'Diseases of the nervous system' (G00-G99), excepting selected codes categorised as infections and ICD-10 Chapter V 'Mental and behavioural disorders' (F00-F99).</p>                                                                                                                                                                                                                                                                                                                                                                                           |
|                                                                                                                                                                                                        | <p><b>Musculoskeletal Disorders:</b> ICD-10 Chapter XIII 'Diseases of the musculoskeletal system and connective tissue'.</p>                                                                                                                                                                                                                                                                                                                                                                                                                                                                                                            |
|                                                                                                                                                                                                        | <p><b>Renal:</b> ICD-10 subchapters 'Renal failure' (N17-N19), 'Glomerular disease' (N00-N08), 'Renal tubule-interstitial disease' (N10-N16), and 'Other disorders of kidney and ureter' (N25-N29), excluding codes classified as infections.</p>                                                                                                                                                                                                                                                                                                                                                                                       |
| <p><b>Other:</b> ICD-10 Chapter XVIII 'Symptoms, signs, and abnormal clinical laboratory findings, not elsewhere classified' (R00-R99), as well as any code not falling into the above categories.</p> |                                                                                                                                                                                                                                                                                                                                                                                                                                                                                                                                                                                                                                         |

## Supplementary Table 10 Codes used to define infection admissions in SMR01

Unless explicitly noted otherwise, three- and four-digit ICD-10 codes contain all codes below them.

| Infection classification     | ICD-10 Code                                                           | Code Description                                                      |
|------------------------------|-----------------------------------------------------------------------|-----------------------------------------------------------------------|
| Infectious disease           | A00 - B99                                                             | Certain infectious and parasitic disease                              |
| Other respiratory infections | H65                                                                   | Nonsuppurative otitis media                                           |
|                              | H65.0                                                                 | Acute serous otitis media                                             |
|                              | H65.1                                                                 | Other acute nonsuppurative otitis media                               |
|                              | H65.2                                                                 | Chronic serous otitis media                                           |
|                              | H65.3                                                                 | Chronic mucoid otitis media                                           |
|                              | H65.4                                                                 | Other chronic nonsuppurative otitis media                             |
|                              | H66.0                                                                 | Acute suppurative otitis media                                        |
|                              | H66.1                                                                 | Chronic tubotympanic suppurative otitis media                         |
|                              | H66.2                                                                 | Chronic atticoantral suppurative otitis media                         |
|                              | H72                                                                   | Perforation of tympanic membrane                                      |
|                              | H73                                                                   | Other disorders of tympanic membrane                                  |
|                              | H80                                                                   | Otosclerosis                                                          |
|                              | H83                                                                   | Other diseases of inner ear                                           |
|                              | J01                                                                   | Acute sinusitis                                                       |
|                              | J02                                                                   | Acute pharyngitis                                                     |
|                              | J03                                                                   | Acute tonsillitis                                                     |
|                              | J04                                                                   | Acute laryngitis and tracheitis                                       |
|                              | J05                                                                   | Acute obstructive laryngitis [croup] and epiglottitis                 |
|                              | J06                                                                   | Acute upper respiratory infections of multiple and unspecified sites  |
|                              | J09                                                                   | Influenza due to identified zoonotic or pandemic influenza virus      |
|                              | J10                                                                   | Influenza due to identified seasonal influenza virus                  |
|                              | J11                                                                   | Influenza, virus not identified                                       |
|                              | J12                                                                   | Viral pneumonia, not elsewhere classified                             |
|                              | J13                                                                   | Pneumonia due to <i>Streptococcus pneumoniae</i>                      |
|                              | J14                                                                   | Pneumonia due to <i>Haemophilus influenzae</i>                        |
|                              | J15                                                                   | Bacterial pneumonia, not elsewhere classified                         |
|                              | J16                                                                   | Pneumonia due to other infectious organisms, not elsewhere classified |
|                              | J17                                                                   | Pneumonia in diseases classified elsewhere                            |
|                              | J18                                                                   | Pneumonia, organism unspecified                                       |
|                              | J20                                                                   | Acute bronchitis                                                      |
|                              | J21                                                                   | Acute bronchiolitis                                                   |
|                              | J22                                                                   | Unspecified acute lower respiratory infection                         |
|                              | J32.9                                                                 | Chronic sinusitis, unspecified                                        |
| J40                          | Bronchitis, not specified as acute or chronic                         |                                                                       |
| J85.1                        | Abscess of lung with pneumonia                                        |                                                                       |
| J86.9                        | Pyothorax without fistula                                             |                                                                       |
| K67.3                        | Tuberculous peritonitis                                               |                                                                       |
| K93.0                        | Tuberculous disorders of intestines, peritoneum and mesenteric glands |                                                                       |
| N74.1                        | Female tuberculous pelvic inflammatory disease                        |                                                                       |
| UTI                          | N11.0                                                                 | Nonobstructive reflux-associated chronic pyelonephritis               |
|                              | N11.8                                                                 | Other chronic tubulo-interstitial nephritis                           |
|                              | N15.0                                                                 | Balkan nephropathy                                                    |
|                              | N15.1                                                                 | Renal and perinephric abscess                                         |
|                              | N30                                                                   | Cystitis                                                              |
|                              | N34                                                                   | Irradiation cystitis                                                  |
|                              | N39.0                                                                 | Cystitis, unspecified                                                 |
| G00                          | Bacterial meningitis, not elsewhere classified                        |                                                                       |

|                           |       |                                                      |
|---------------------------|-------|------------------------------------------------------|
|                           | G03   | Meningitis due to other and unspecified causes       |
|                           | G04   | Encephalitis, myelitis and encephalomyelitis         |
|                           | H70.1 | Chronic mastoiditis                                  |
| Other infectious diseases | I00   | Rheumatic fever without mention of heart involvement |
|                           | I01   | Rheumatic fever with heart involvement               |
|                           | I02   | Rheumatic chorea                                     |
|                           | I30   | Acute pericarditis                                   |
|                           | I33   | Acute and subacute endocarditis                      |
|                           | I40   | Acute myocarditis                                    |
|                           | L03   | Cellulitis                                           |

### Supplementary Table 11 Codes used to define chronic respiratory disease admissions in SMR01

Unless explicitly noted otherwise, three- and four-digit ICD-10 codes contain all codes below them.

| ICD-10 code | Code Description                                             |
|-------------|--------------------------------------------------------------|
| D86.0       | Sarcoidosis of lung                                          |
| D86.1       | Sarcoidosis of lymph nodes                                   |
| D86.2       | Sarcoidosis of lung with sarcoidosis of lymph nodes          |
| D86.8       | Sarcoidosis of other and combined sites                      |
| D86.9       | Sarcoidosis, unspecified                                     |
| J38.0       | Paralysis of vocal cords and larynx                          |
| J38.6       | Stenosis of larynx                                           |
| J39.0       | Retropharyngeal and parapharyngeal abscess                   |
| J39.2       | Other diseases of pharynx                                    |
| J39.8       | Other specified diseases of upper respiratory tract          |
| J41         | Simple and mucopurulent chronic bronchitis                   |
| J42         | Unspecified chronic bronchitis                               |
| J43         | Emphysema                                                    |
| J44         | Other chronic obstructive pulmonary disease                  |
| J45         | Asthma                                                       |
| J46         | Status asthmaticus                                           |
| J47         | Bronchiectasis                                               |
| J60         | Coal worker pneumoconiosis                                   |
| J61         | Pneumoconiosis due to asbestos and other mineral fibres      |
| J63         | Pneumoconiosis due to other inorganic dusts                  |
| J64         | Unspecified pneumoconiosis                                   |
| J67.0       | Farmer lung                                                  |
| J67.9       | Hypersensitivity pneumonitis due to unspecified organic dust |
| J69.0       | Pneumonitis due to food and vomit                            |
| J81         | Pulmonary oedema                                             |
| J82         | Pulmonary eosinophilia, not elsewhere classified             |
| J84         | Other interstitial pulmonary diseases                        |
| J90         | Pleural effusion, not elsewhere classified                   |
| J92.9       | Pleural plaque with presence of asbestos                     |
| J93.1       | Other spontaneous pneumothorax                               |
| J93.9       | Pneumothorax, unspecified                                    |
| J94.1       | Fibrothorax                                                  |
| J94.8       | Other specified pleural conditions                           |
| J96.1       | Chronic respiratory failure                                  |
| J96.9       | Respiratory failure, unspecified                             |
| J98.1       | Pulmonary collapse                                           |
| J98.4       | Other disorders of lung                                      |
| J98.8       | Other specified respiratory disorders                        |
| J98.9       | Respiratory disorder, unspecified                            |

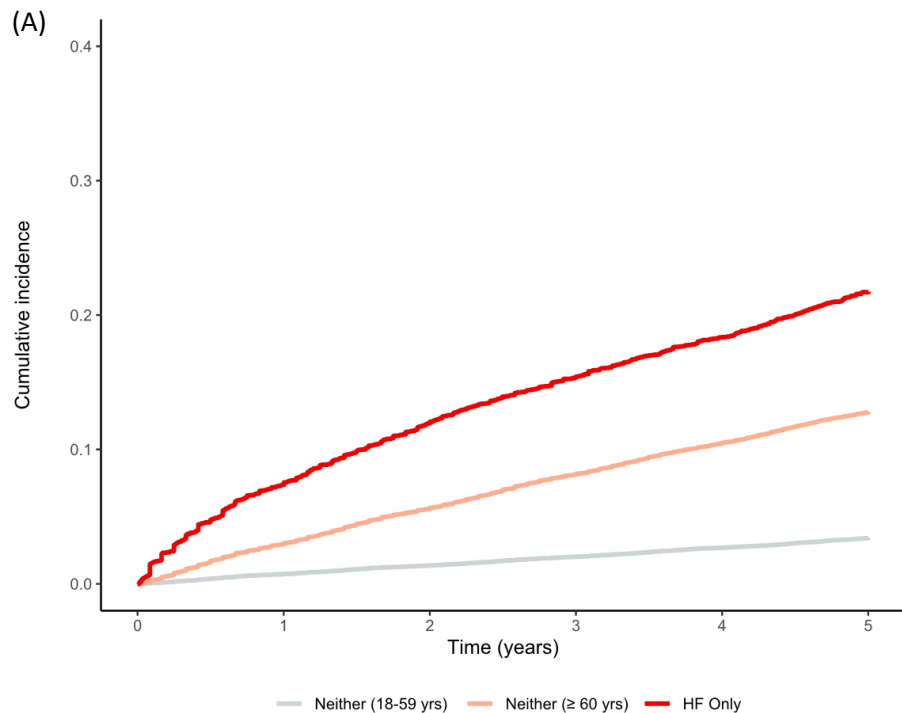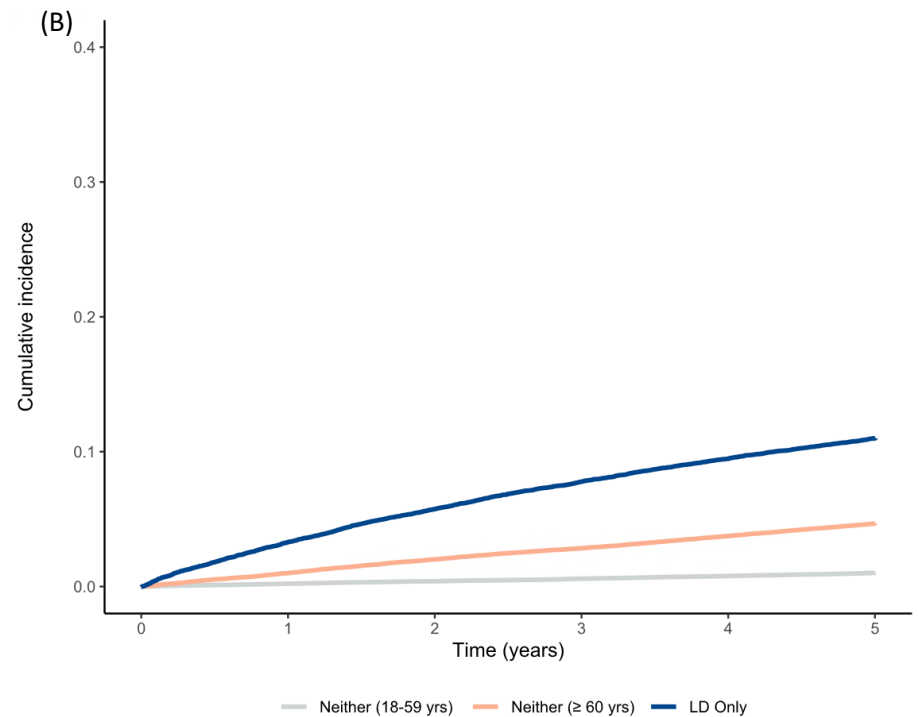

Number at risk

|   |       |       |       |       |       |       |
|---|-------|-------|-------|-------|-------|-------|
| — | 72236 | 71100 | 69989 | 68786 | 67494 | 65758 |
| — | 89699 | 83908 | 78551 | 73335 | 68379 | 63547 |
| — | 5156  | 4536  | 4121  | 3778  | 3505  | 3205  |

Number at risk

|   |       |       |       |       |       |       |
|---|-------|-------|-------|-------|-------|-------|
| — | 72236 | 71440 | 70621 | 69690 | 68676 | 67219 |
| — | 89699 | 85443 | 81185 | 77049 | 72789 | 68484 |
| — | 23963 | 20990 | 18558 | 16420 | 14585 | 13009 |

### Supplementary Figure 6 5-year cumulative incidence of loop diuretic (LD) initiation or diagnosis of heart failure (HF)

(A) Cumulative incidence of the initiation of loop diuretics in the three relevant populations who had not received a loop diuretic at baseline (Neither [18-59 yrs], Neither [≥ 60 yrs], and HF Only).

(B) Cumulative incidence of the diagnosis of HF in the three relevant populations without a diagnosis at baseline (Neither [18-59 yrs], Neither [≥ 60 yrs], and loop diuretic [LD] Only).

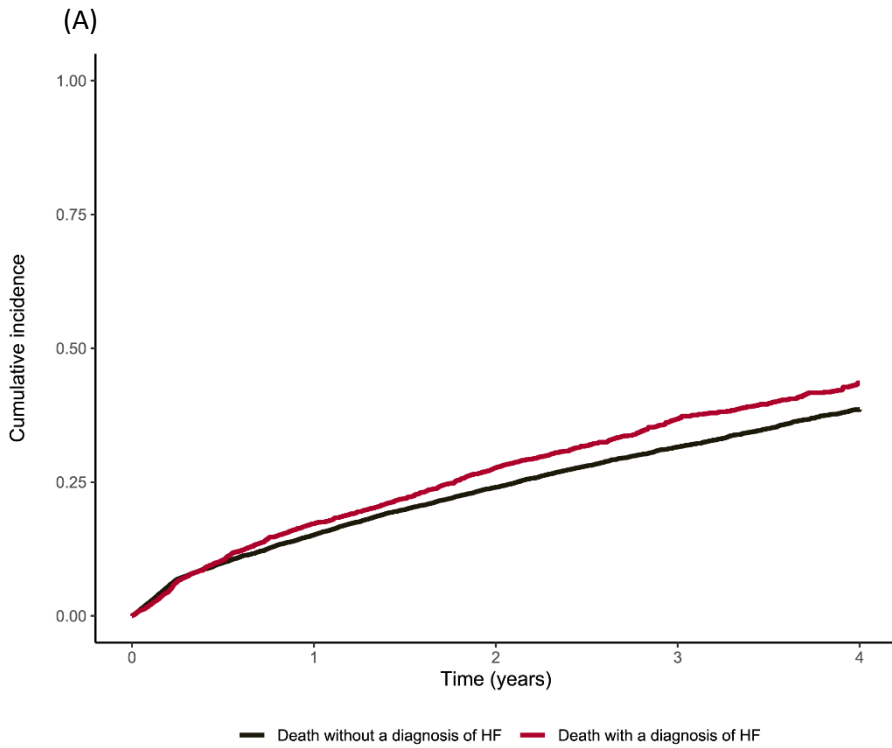

Number at risk

|   |       |      |      |      |      |
|---|-------|------|------|------|------|
| — | 11906 | 8320 | 5763 | 3597 | 1745 |
| — | 3097  | 2072 | 1443 | 877  | 432  |

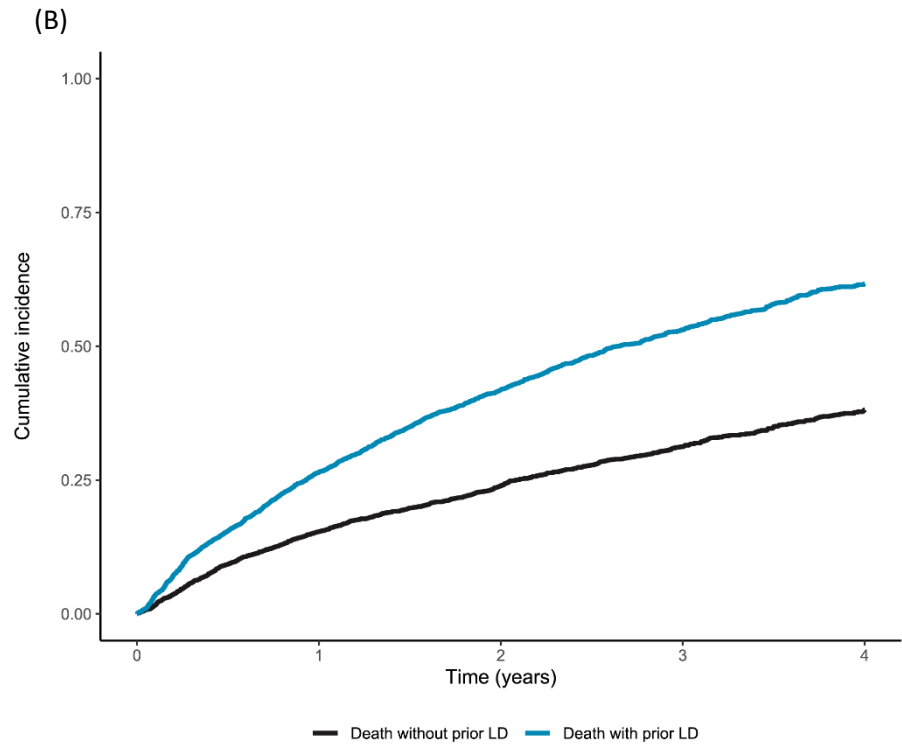

Number at risk

|   |      |      |      |      |     |
|---|------|------|------|------|-----|
| — | 3534 | 2491 | 1767 | 1192 | 574 |
| — | 4012 | 2407 | 1449 | 820  | 368 |

**Supplementary Figure 7: 4-year mortality from initiation of loop diuretics (LD) or diagnosis of heart failure (HF) during follow-up**

(A) For patients initially in the 'neither' group, all-cause mortality from the initiation of loop diuretics in those with and without a prior diagnosis of heart failure (when the diagnosis of HF and initiation of loop diuretics were concurrent, HF was considered the prior event).

(B) For patients initially in the 'neither' group, all-cause mortality from the diagnosis of heart failure in those who had or had not been initiated on loop diuretics (when the diagnosis of HF and initiation of loop diuretics were concurrent, loop diuretic initiation was considered the prior event).

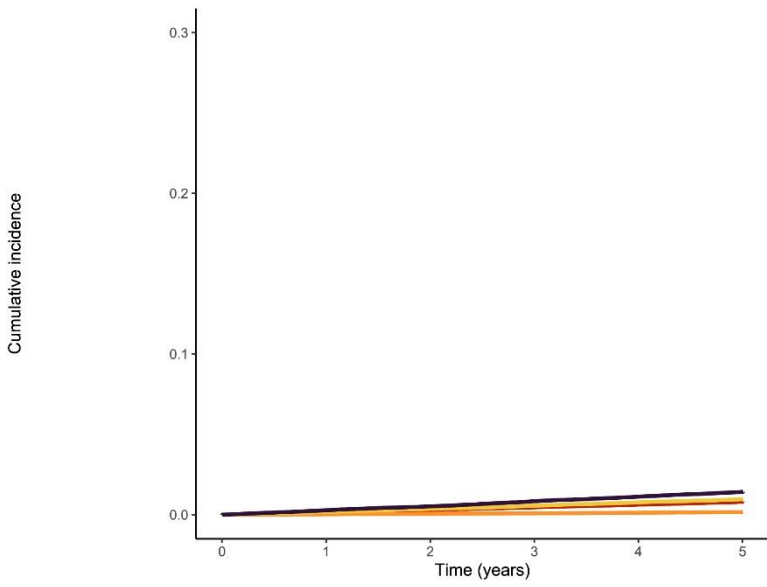

— Cardiovascular — Infection — Neoplasm — Other

Number at risk

Neither (18-59 yrs) 72236 71588 70892 70085 69194 67870

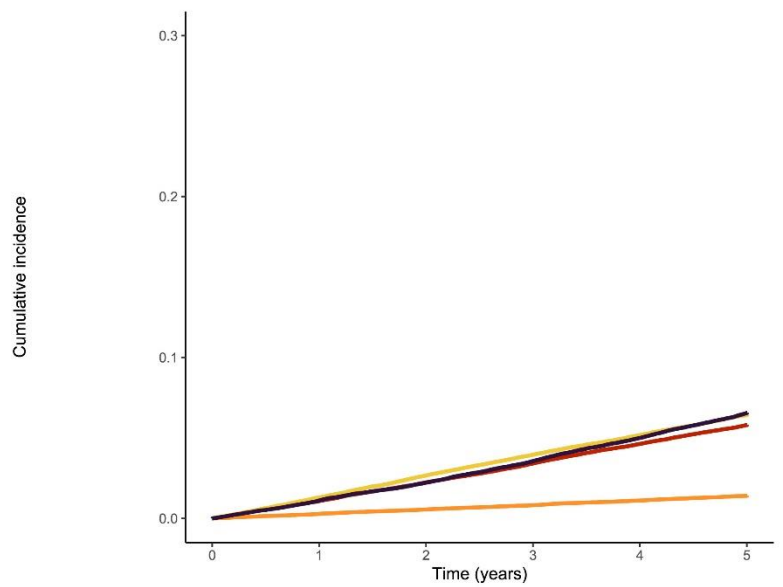

— Cardiovascular — Infection — Neoplasm — Other

Number at risk

Neither (≥ 60 yrs) 89699 86244 82681 78999 75195 71292

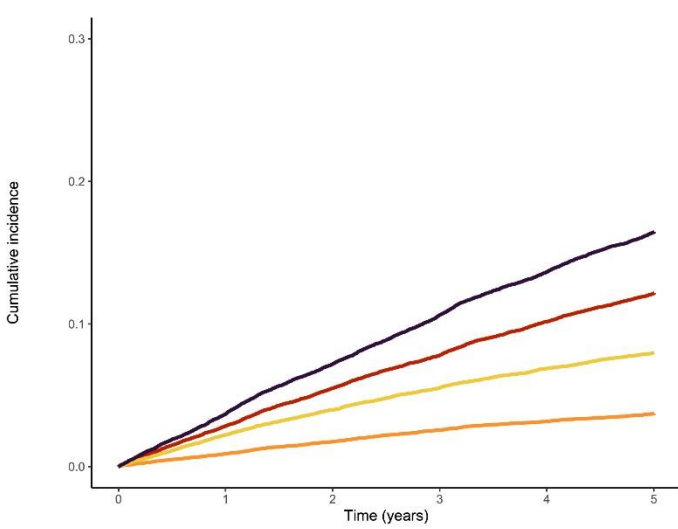

— Cardiovascular — Infection — Neoplasm — Other

Number at risk

LD Only 23963 21644 19536 17591 15822 14266

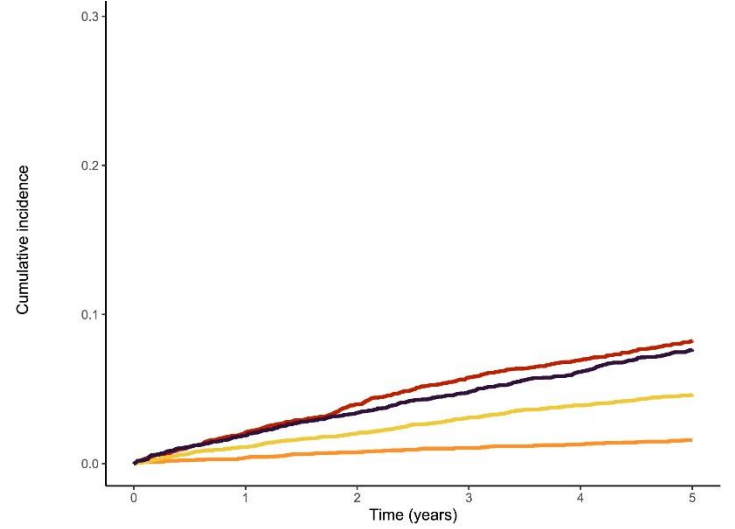

— Cardiovascular — Infection — Neoplasm — Other

Number at risk

HF Only 5156 4875 4631 4394 4204 3998

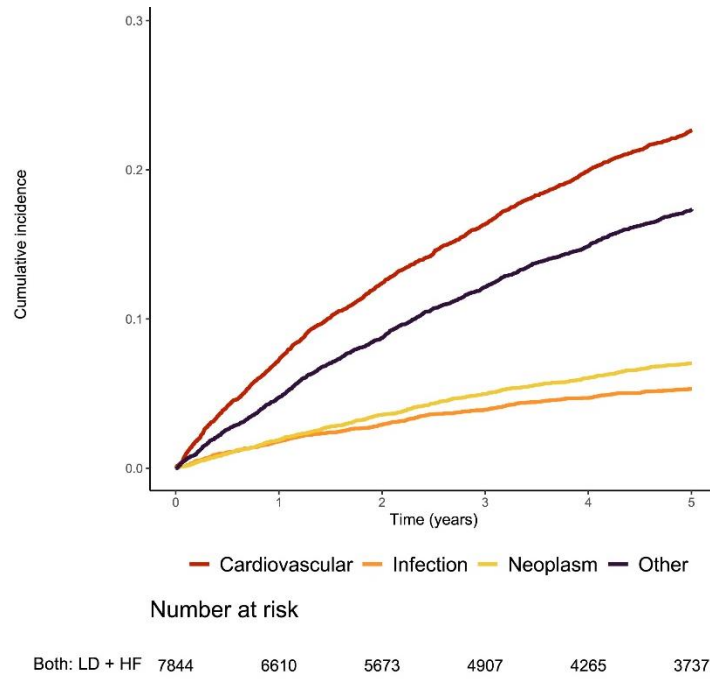

Supplementary Figure 8 5-year cumulative incidence of causes of death by baseline group classification on 31 December 2011.



## Data on the loop diuretic only population

Supplementary Table 12 Demographics and co-morbidities of individuals with loop diuretics only at baseline classified by survival status at the end of follow-up

|                                                                                                                               | Censored<br>n = 14,322 | Died<br>n = 9,641  |
|-------------------------------------------------------------------------------------------------------------------------------|------------------------|--------------------|
| Age at baseline (years)                                                                                                       | 71 (61 - 78)           | 81 (74 - 87)       |
| Length of follow-up (years)                                                                                                   | 5.00 (5.00 - 5.00)     | 2.19 (1.04 - 3.43) |
| Sex                                                                                                                           |                        |                    |
| Women                                                                                                                         | 10,581 (74%)           | 6,194 (64%)        |
| Men                                                                                                                           | 3,741 (26%)            | 3,447 (36%)        |
| Ethnicity                                                                                                                     |                        |                    |
| White                                                                                                                         | 12,244 (85%)           | 8,416 (87%)        |
| Missing                                                                                                                       | 1,803 (13%)            | 1,099 (11%)        |
| Other                                                                                                                         | 275 (2%)               | 126 (1%)           |
| Scottish Index of Multiple Deprivation                                                                                        |                        |                    |
| 1 (most deprived)                                                                                                             | 6,355 (44%)            | 4,170 (43%)        |
| 2                                                                                                                             | 2,718 (19%)            | 1,806 (19%)        |
| 3                                                                                                                             | 1,808 (13%)            | 1,428 (15%)        |
| 4                                                                                                                             | 1,559 (11%)            | 1,077 (11%)        |
| 5 (least deprived)                                                                                                            | 1,882 (13%)            | 1,160 (12%)        |
| Co-morbidities*                                                                                                               |                        |                    |
| History of hypertension                                                                                                       | 5,884 (41%)            | 3,226 (33%)        |
| Diabetes mellitus                                                                                                             | 3,185 (22%)            | 1,673 (17%)        |
| Thyroid disease                                                                                                               | 572 (4%)               | 511 (5%)           |
| CAD (including myocardial infarction)                                                                                         | 4,396 (31%)            | (50%)              |
| Myocardial Infarction                                                                                                         | 1,302 (9%)             | 1,183 (12%)        |
| Valve disease                                                                                                                 | 565 (4%)               | 574 (6%)           |
| Atrial fibrillation/ flutter                                                                                                  | 1,820 (13%)            | 2,073 (22%)        |
| Peripheral arterial disease                                                                                                   | 421 (3%)               | 502 (5%)           |
| Stroke                                                                                                                        | 1,140 (8%)             | 1,245 (13%)        |
| Chronic obstructive pulmonary disease                                                                                         | 2,533 (18%)            | 2,083 (22%)        |
| Liver disease <sup>⊕</sup>                                                                                                    | 169 (1%)               | 216 (2%)           |
| Cancer                                                                                                                        | 1,029 (7%)             | 1,251 (13%)        |
| Dementia                                                                                                                      | 257 (2%)               | 938 (10%)          |
| Data are frequencies (%) for categorical values or median (1 <sup>st</sup> – 3 <sup>rd</sup> quartile) for continuous values. |                        |                    |
| * History of a coded record on or before 1 <sup>st</sup> January 2012                                                         |                        |                    |
| ⊕ Defined by the presence of liver fibrosis, sclerosis, or cirrhosis                                                          |                        |                    |
| CAD, coronary artery disease                                                                                                  |                        |                    |

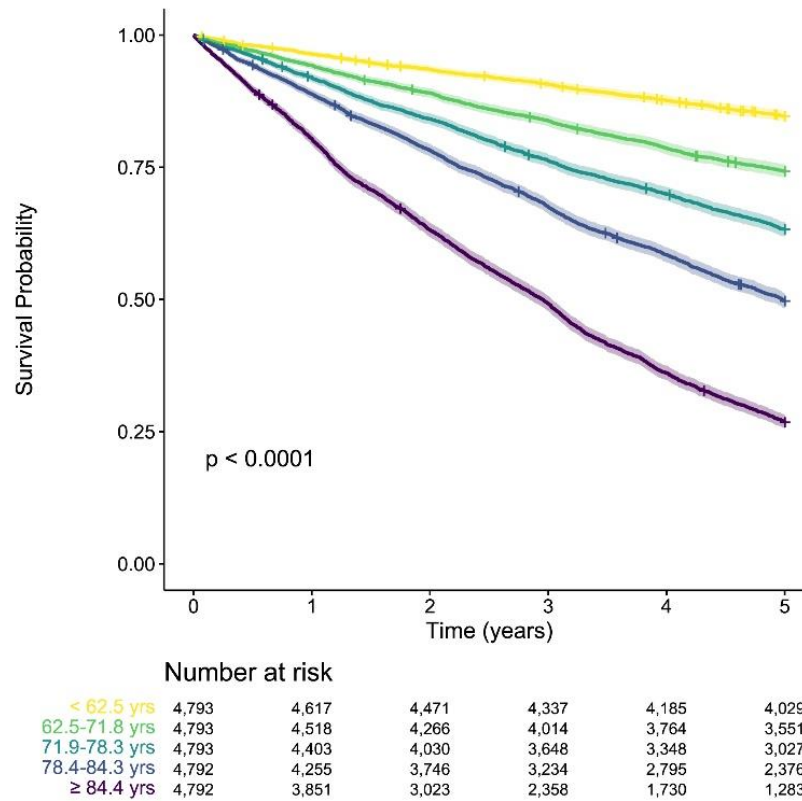

Supplementary Figure 9 5-year Kaplan-Meier curves to compare survival rates of those with only a loop diuretic at baseline by quintile of age as of 1 January 2012.

## Time-dependent covariate analysis

Time-dependent analysis was conducted where the diagnosis of heart failure and the initiation of a loop diuretic were triggers for updating group and comorbidity status.

If the calculations are conducted using the time-dependent groups, that same patient contributed no admissions and 367 days (or 1.00 admission-free patient-years) of admission-free follow-up to the Neither ( $\geq 60$  yrs) group. Then, the patient contributed one infection admission, one injury admission, and 726 admission-free days (or 1.99 admission-free patient-years) of follow-up to where they had only a loop diuretic (LD only group). Finally, the patient changed groups for the second time based on the heart failure diagnosis in hospital. From this point, the patient contributed one heart failure admission, one infection admission, and one other CV admission plus 725 admission-free days (or 1.98 admission-free patient-years) of follow-up to where they had were on both loop diuretics and diagnosed with heart failure (Both: LD + HF) before dying on 31<sup>st</sup> December 2016. In total, the patient contributed 367 days to 'Neither ( $\geq 60$

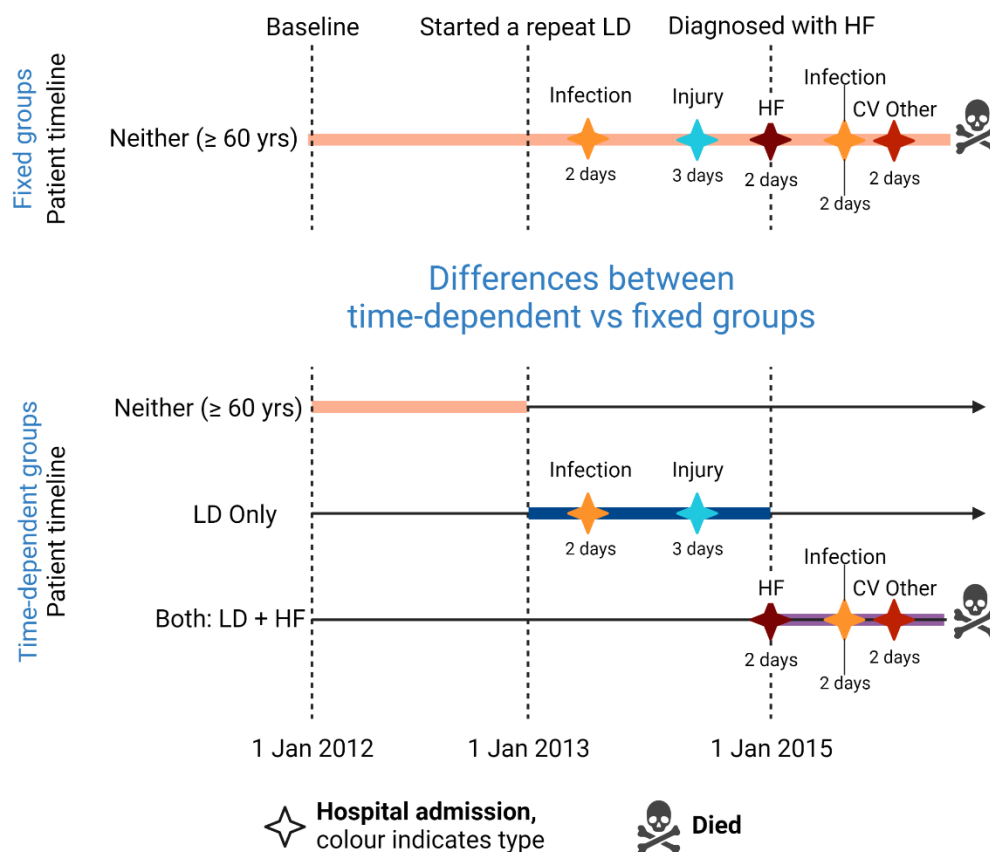

### Supplementary Figure 10 Explanation of changes in assigning patient time at risk based on the analysis method.

LD, loop diuretic; HF, heart failure

(top) Patient time at risk was calculated using baseline group classification, while (bottom) patient time at risk was calculated using time-dependent groups based on the presence or absence of LD and HF. If calculations are conducted using the fixed baseline group, the patient's follow-up started on 1 January 2012 and ended when the patient died on the 31 of December 2016. Subtracting the 11 days the patient was admitted to hospital, the patient contributed two infection admissions, one injury admission, one heart failure admission, and one other CV admission, plus 1,816 days or 4.97 patient-years of follow-up to the Neither ( $\geq 60$  yrs) group admissions calculations. Regarding mortality, the patient contributed 1,827 days to the Neither ( $\geq 60$  yrs) group and the death is also attributed to the Neither ( $\geq 60$  yrs).

If calculations are conducted using the time-dependent groups, the patient contributed 365 days to the Neither ( $\geq 60$  yrs) group, and 731 days to each of LD only and Both: LD + HF, and the death record is attributed to the Both: LD + HF group. Where the diagnosis of heart failure and the initiation of loop diuretic were recorded on the same day, patients moved directly having both loop diuretics and HF (Both: LD + HF) without first contributing to either loop diuretic only or HF only.

### Handling missing eGFR data

Based on previous analysis using West of Scotland Safe Haven Data, the absence of blood tests is associated with lower hazards of all-cause mortality(24); therefore, missing eGFR tests were classified as missing not at random. The impact of the dependence of the analysis on the missing values was measured by adding eGFR, where available, as a penalised spline with 5 knots (4 degrees of freedom) and, where applicable, substituting the missing values sequentially with a credible range of values(25). Five analyses were run based on the following:

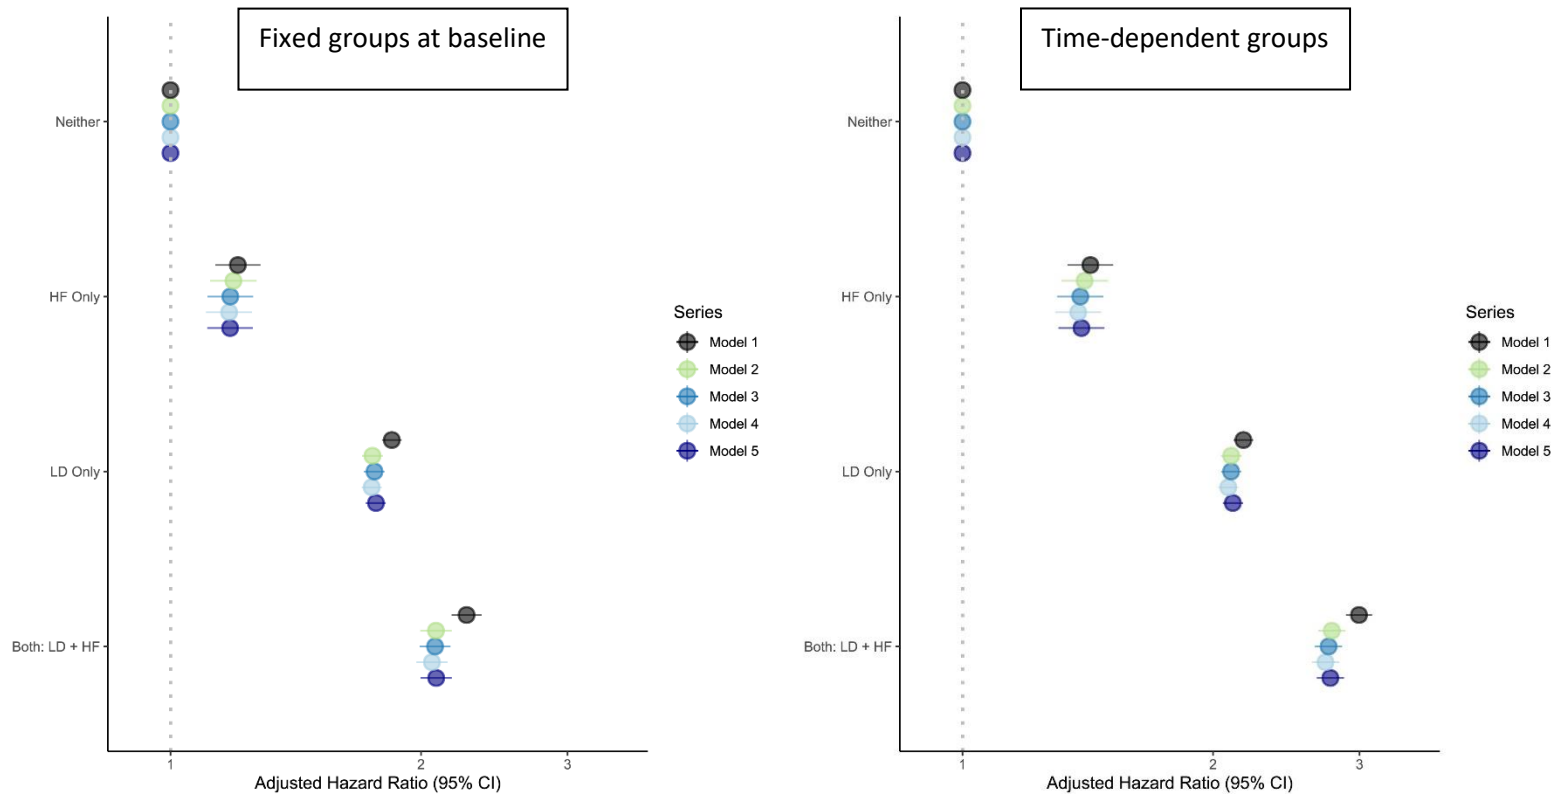

Supplementary Figure 11 Changes in 5-year all-cause mortality adjusted hazard ratios based on using complete eGFR case analysis against replacing missing values in turn with available per group median value, first quartile per group value, and third quartile per group value.

Model 1) adjusting for age as a continuous variable, sex, Scottish Index of Multiple Deprivation, and comorbidities (base model). Model 2) Adjusting for the covariates used in Model 1 plus eGFR for those with an eGFR measurement in the prior two years; Model 3) Adjusting for the covariates used in Model 1 plus eGFR, substituting the missing eGFR values with the per group median value. Model 4) Adjusting for the covariates used in Model 1 plus eGFR, substituting the missing values with the first quartile value per group. Finally, Model 5) Adjusting for the covariates used in Model 1 plus eGFR, substituting the missing values with the third quartile value per group.

Supplementary Table 12 Median (1<sup>st</sup>-3<sup>rd</sup> quartile) values of eGFR at baseline and time-dependent status for the study population classified by prescription of loop diuretics (LD) and diagnosis of heart failure (HF)

| Baseline                                  | Neither (18-59 yrs) | Neither (≥ 60 yrs) | LD Only      | HF Only      | Both: LD + HF |
|-------------------------------------------|---------------------|--------------------|--------------|--------------|---------------|
| n                                         | 72,236              | 89,699             | 23,963       | 5,156        | 7,844         |
| Age (years)                               | 50 (41 - 55)        | 72 (66 - 78)       | 75 (65 - 83) | 69 (59 - 78) | 77 (68 - 83)  |
| Patient-record of eGFR                    | 57,305 (79%)        | 83,815 (93%)       | 22,575 (94%) | 4,962 (96%)  | 7,656 (98%)   |
| eGFR (mL/min/1.73m <sup>2</sup> )         | 99 (90 - 106)       | 78 (64 - 88)       | 71 (52 - 85) | 81 (64 - 92) | 61 (43 - 79)  |
| Time-dependent covariates                 |                     |                    |              |              |               |
| n                                         | 72,236              | 89,699             | 35,869       | 8,690        | 14,938        |
| Time-dependent age (years)                | 50 (41 - 55)        | 72 (66 - 78)       | 75 (65 - 83) | 72 (62 - 80) | 78 (70 - 84)  |
| Patient record of eGFR in prior two years | 57,305 (79%)        | 83,815 (93%)       | 34,262 (96%) | 8,463 (97%)  | 14,728 (99%)  |
| eGFR (mL/min/1.73m <sup>2</sup> )         | 99 (90- 106)        | 78 (64 - 88)       | 71 (53 - 85) | 77 (58 - 90) | 61 (42 - 78)  |

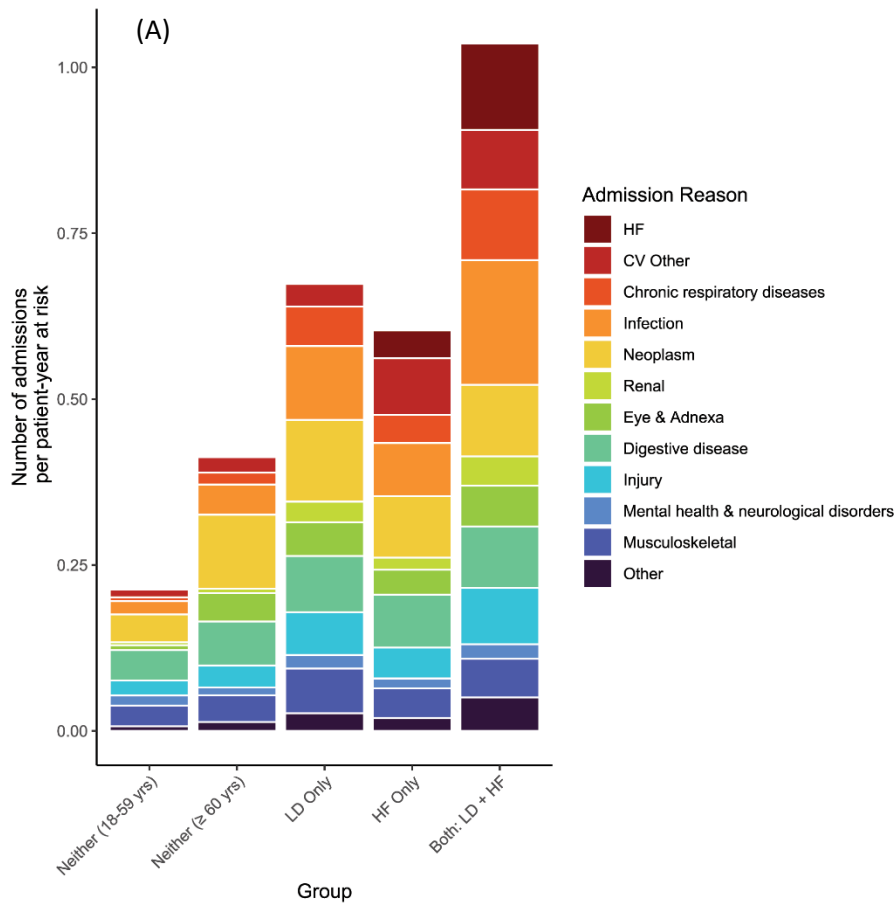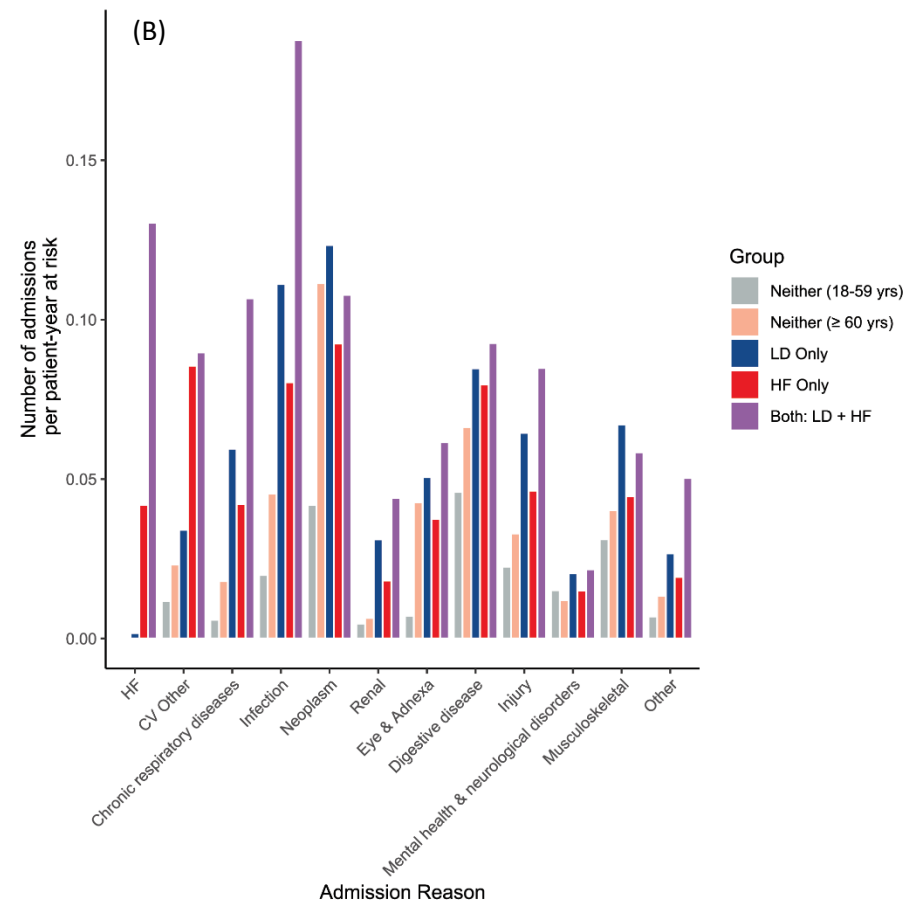

Supplementary Figure 12 Number and type of admissions per person-year at risk from 1 January 2012 through 31 December 2016, where the group is a time-dependent covariate.

(A) Number of admissions per person-year at risk reported by group spit by admission reason. The number of admissions is split by admission reason.

(B) Number of admissions per person-year at risk reported by admission reason, split by group.

LD, loop diuretic; HF, heart failure

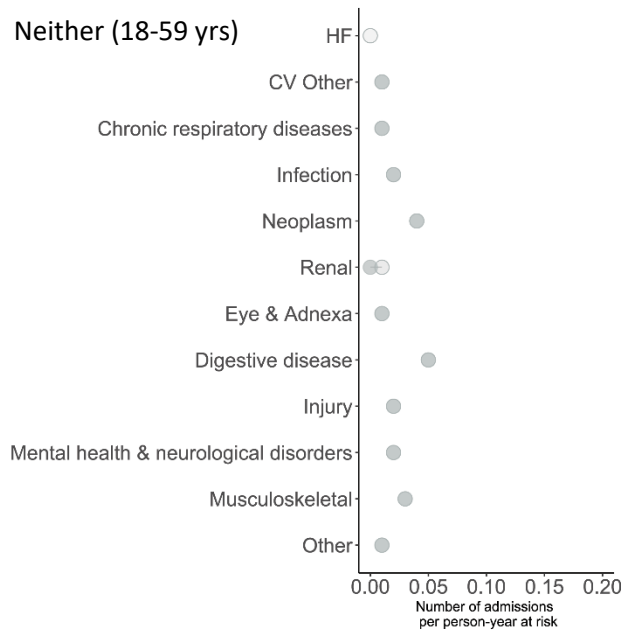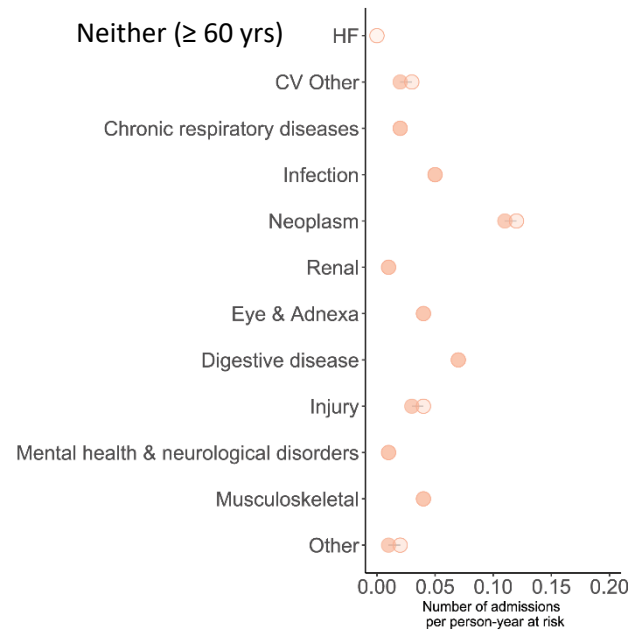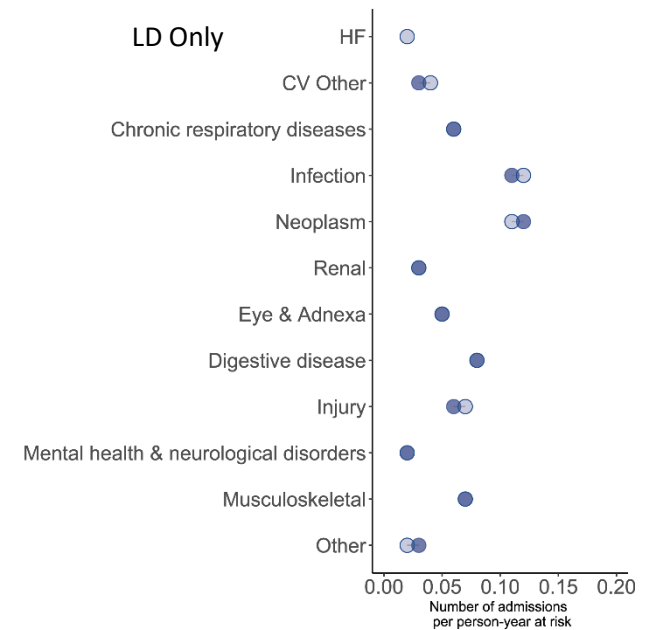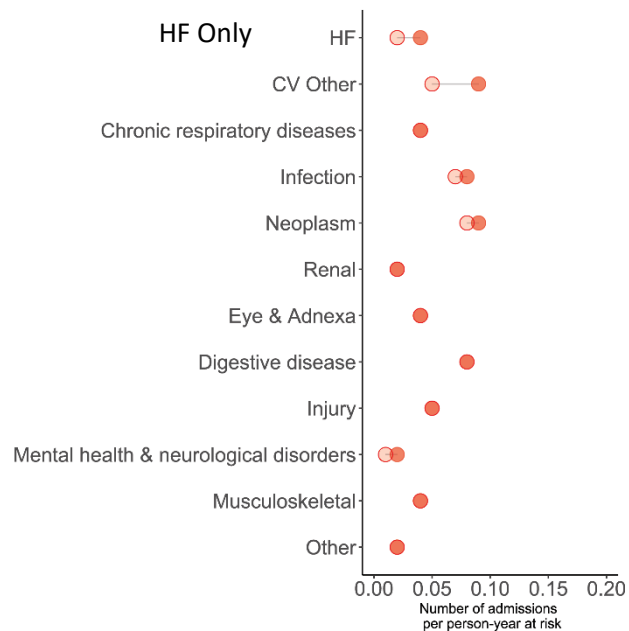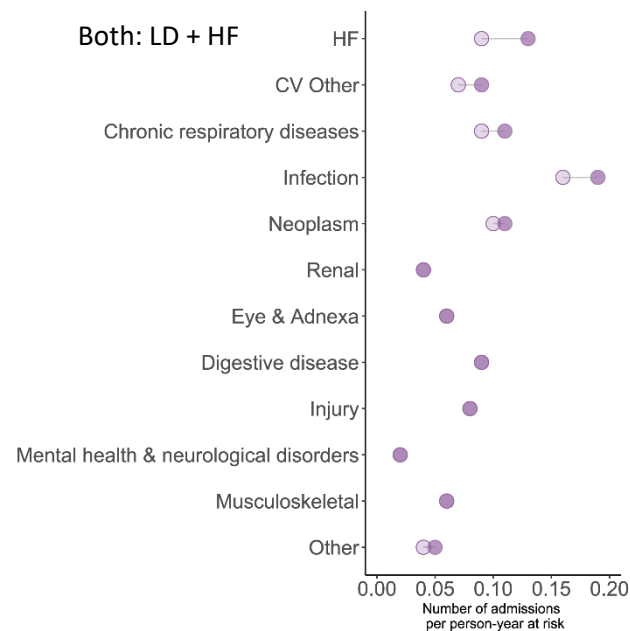

**Supplementary Figure 13**  
 Admission rates using baseline  
 (light circle) versus time-  
 dependent (dark circle)

If circles overlap entirely, only the time-dependent changes in the classification circle are visible.

While baseline classification attributes all admissions to the patient's baseline group, the time-dependent classification only attributes admissions and time at risk accrued while classified as a specific group (i.e., a 'neither' patient contributes time and events to the LD only at the initiation of LD and may contribute time and events to Both: LD + HF upon receiving a diagnosis of HF (see above for further details).

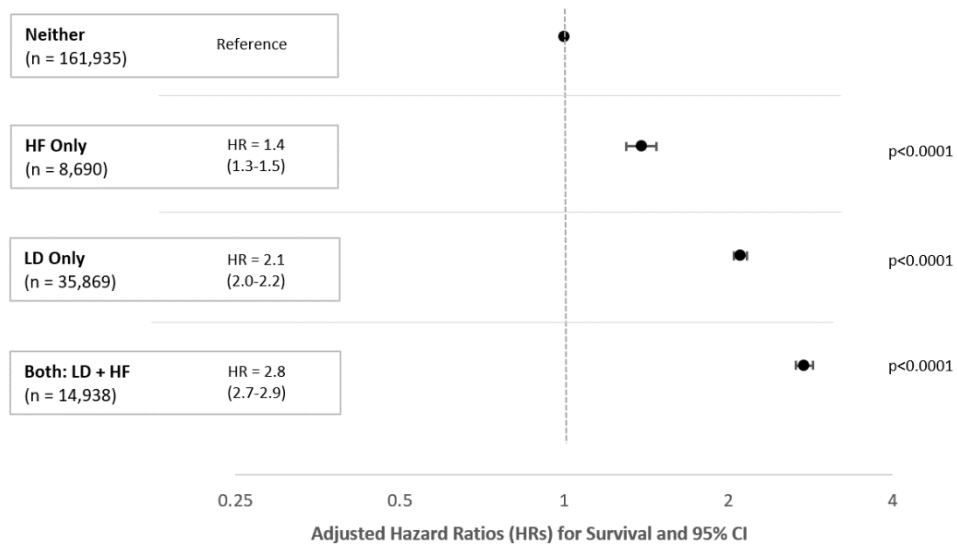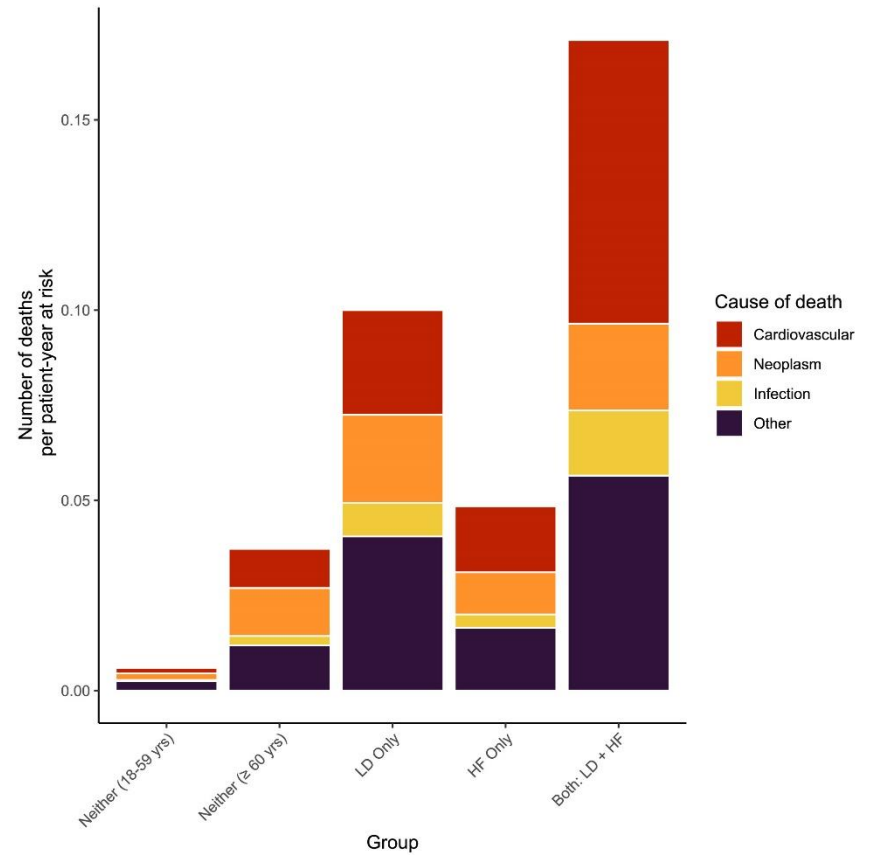

**Supplementary Figure 14 5-year mortality using time-dependent groups.**

(left) Forest plot of hazard ratios (HR) with 95% confidence intervals (CI) for all-cause mortality by time-dependent group between 1 January 2012 through 31 December 2016. The model was adjusted for by age, sex, SIMD, time-dependent comorbidity status, and closest eGFR in the prior two years.

(right) Number of deaths per patient-year at risk by group, stratified by cause of death.

LD, loop diuretic; HF, heart failure



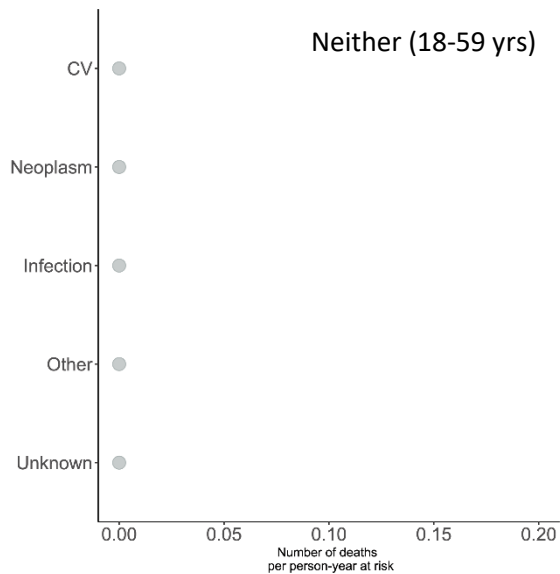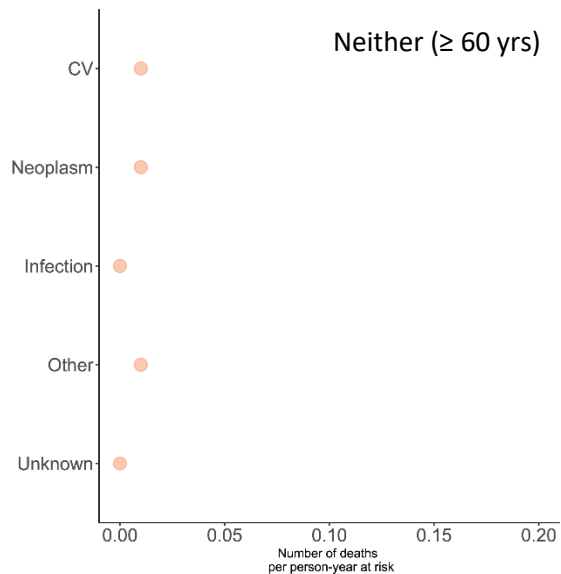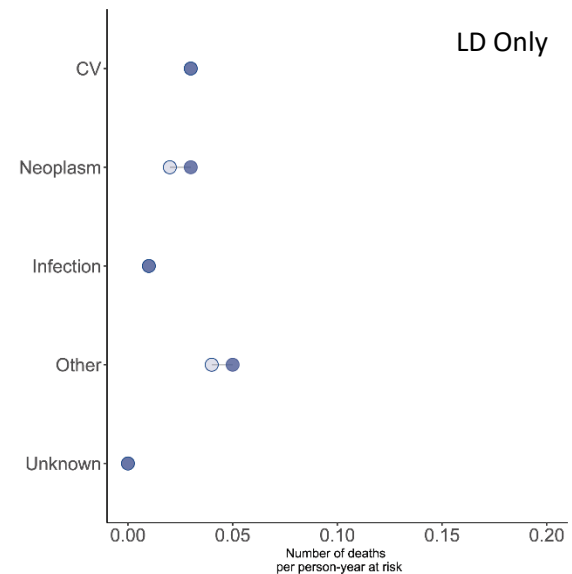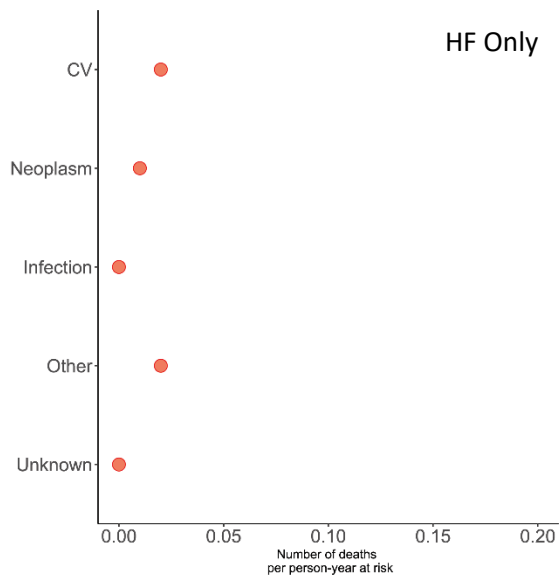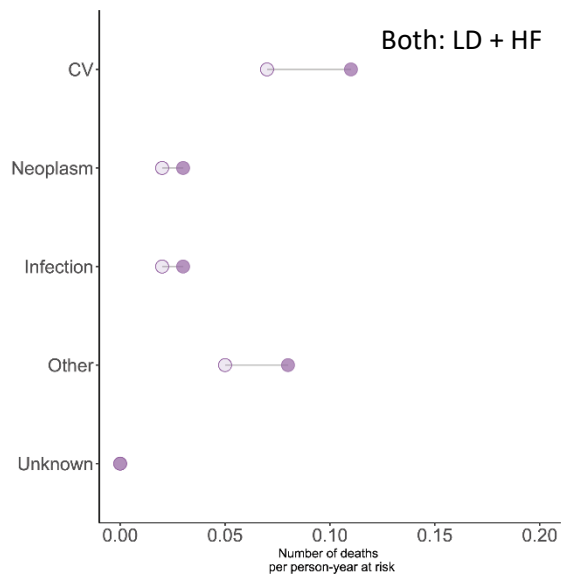

Supplementary Figure 15 Mortality rates using baseline (light circle) versus time-dependent (dark circle) classifications.

If circles overlap entirely, only the time-dependent results can be seen.

With time-dependent classification, deaths and time at risk were attributed to 'LD Only' where the patient either only had a LD at baseline and was never labelled as having HF, or only the time period following the initiation of a LD during follow-up and did not receive a diagnosis of HF. Under time-dependent classification, patients in Both: LD + HF fall under one of the following scenarios: a) classified as Both: LD + HF at baseline; b) started on a LD only and were subsequently diagnosed with HF; c) started as diagnosed with HF only and were subsequently initiated on a repeat LD; or d) in a 'neither' group and subsequently diagnosed with heart failure and initiated on a LD in any order. Only the time and events which occur after an LD has been initiated and heart failure diagnosed count towards Both: LD + HF.

# Classification of patients at time of death

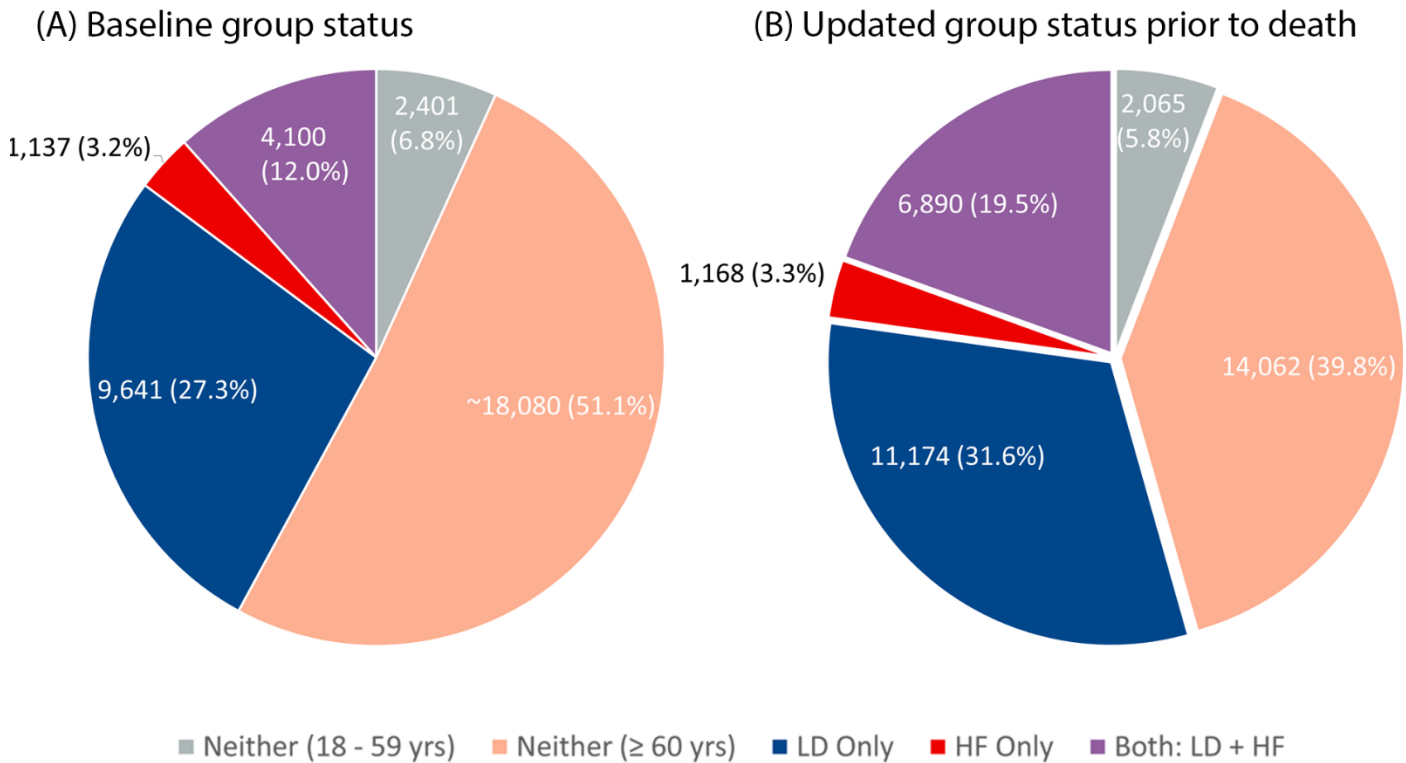

Supplementary Figure 16: Classification of group status at time of death using (A) baseline and (B) time-dependent classification prior to death during 5 years of follow-up.

## References

1. NHS Digital. DCB0084: OPCS Classification of Interventions and Procedures 2019 [updated 4 December 2019 9:13 am. Available from: <https://digital.nhs.uk/data-and-information/information-standards/information-standards-and-data-collections-including-extractions/publications-and-notifications/standards-and-collections/dcb0084-opcs-classification-of-interventions-and-procedures>.
2. Booth N. What are the Read Codes? In: Classification CfCa, editor. Health Libraries Review. Woodgate, Loughborough, Leics LE11 2TG1994. p. 177-82.
3. Public Health Scotland. PTI Statistics, Grouping of codes for conditions (RCGs) 2020 [updated 16 March 2022; cited 2023. Available from: [https://www.isdscotland.org/Health-Topics/General-Practice/GP-Consultations/Grouping-clinical-codes.asp#:~:text=Read%20codes%20\(version%20%2C%20Scottish,and%20Social%20Care%20Information%20website](https://www.isdscotland.org/Health-Topics/General-Practice/GP-Consultations/Grouping-clinical-codes.asp#:~:text=Read%20codes%20(version%20%2C%20Scottish,and%20Social%20Care%20Information%20website).
4. Public Health Scotland. SMR Completeness 2020 [Available from: <https://www.isdscotland.org/Products-and-Services/Data-Support-and-Monitoring/SMR-Completeness/>.
5. ISD Scotland. SMR01 - Summary of Rules [Available from: <https://www.ndc.scot.nhs.uk/Dictionary-A-Z/Definitions/index.asp?Search=S&ID=997&Title=SMR01%20-%20Summary%20of%20Rules>.
6. Conrad N, Judge A, Tran J, Mohseni H, Hedgecote D, Crespillo AP, et al. Temporal trends and patterns in heart failure incidence: a population-based study of 4 million individuals. *Lancet*. 2018;391(10120):572-80.

7. Reeves D, Springate DA, Ashcroft DM, Ryan R, Doran T, Morris R, et al. Can analyses of electronic patient records be independently and externally validated? The effect of statins on the mortality of patients with ischaemic heart disease: a cohort study with nested case–control analysis. 2014;4(4):e004952.
8. Alvarez-Madrado S, McTaggart S, Nangle C, Nicholson E, Bennie M. Data Resource Profile: The Scottish National Prescribing Information System (PIS). International Journal of Epidemiology. 2016;45(3):714-5f.
9. The Scottish Government. Scottish Index of Multiple Deprivation 2012. In: National Statistics, editor. Edinburgh2012.
10. Wickham H, Averick M, Bryan J, Chang W, McGowan LDA, François R, et al. Welcome to the Tidyverse. Journal of open source software. 2019;4(43):1686.
11. Therneau TM. A Package for Survival Analysis in R. R package version 3.3-1 <https://CRAN.R-project.org/package=survival> ed2022.
12. Kassambara A, Kosinski M, Biecek P. survminer: Drawing Survival Curves using 'ggplot2'. R package version 0.4.9 <https://CRAN.R-project.org/package=survminer> ed2021.
13. Ripley B, Lapsley M. RODBC: ODBC Database Access. R package version 1.3-19 <https://CRAN.R-project.org/package=RODBC> ed2021.
14. Garnier S, Ross N, Rudis R, Camargo AP, Sciaini M, Scherer C. viridis - Colorblind-Friendly Colro Maps for R. R package version 0.6.2 <https://sjmgarnier.github.io/viridis/> ed2021.
15. Gray R. cmprsk: Subdistribution Analysis of Competing Risks. R package version 2.2-10 <https://CRAN.R-project.org/package=cmprsk> ed2020.
16. Golemud G, Wickham H. Dates and Times Made Easy with lubridate. Journal of Statistical Software. 2011;40(3):1--25.
17. Robinson D, Hayes A, Couch S. broom: Convert Statistical Objects into Tidy Tibbles. R package version 0.7.10 <https://CRAN.R-project.org/package=broom> ed2021.
18. Tang Y, Horikoshi M, Li W. ggfortify: unified interface to visualize statistical results of popular R packages. R J. 2016;8(2):474.
19. Wickham H. forcats: Tools for Working with Categorical Variables (Factors). R package version 0.5.1 <https://CRAN.R-project.org/package=forcats> ed2021.
20. Auguie B. gridExtra: Miscellaneous Functions for "Grid" Graphics. R package version 2.3 <https://CRAN.R-project.org/package=gridExtra> ed2017.
21. Kassambara A. ggpubr: 'ggplot2' Based Publication Ready Plots. R package version 0.4.0 <https://CRAN.R-project.org/package=ggpubr> ed2020.
22. Wickham H. Reshaping Data with the reshape Package. Journal of Statistical Software. 2007;21(12):1--20.
23. National Records of Scotland. Mid-year population estimates by pre-April 2014 NHS Board areas by single year of age and sex: 1981-2013 Population Estimates Time Series Data: 'National Records of Scotland'; 2018.
24. Graham FJ, Friday JM, Pellicori P, Greenlaw N, Cleland JG. Assessment of haemoglobin and serum markers of iron deficiency in people with cardiovascular disease. Heart (British Cardiac Society) [Internet]. 2023 2023/08//; 109(17):[1294-301 pp.]. Available from: <http://europepmc.org/abstract/MED/37130747>  
<https://heart.bmj.com/content/heartjnl/early/2023/05/01/heartjnl-2022-322145.full.pdf>
25. Lash TL, Fox MP, MacLehose RF, Maldonado G, McCandless LC, Greenland S. Good practices for quantitative bias analysis. International Journal of Epidemiology. 2014;43(6):1969-85.
